# Supplementary material for: Surveys of the salt content in UK bread: progress made and further reductions possible
Source: PubMed Central journal article supplement — BMJ Open. 2013 Jun 14;3(6):e002936. doi: 10.1136/bmjopen-2013-002936 (PMC3686219; doi:10.1136/bmjopen-2013-002936), 2013-06-14
Supplement: bmjopen-2013-002936.draft_revisions.pdf [file bmjopen-2013-002936.draft_revisions.pdf]

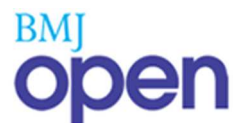

**Surveys of the salt content in UK bread – Progress made  
and further reductions possible**

|                                 |                                                                                                                                                                                                                                                                                                                                                                                    |
|---------------------------------|------------------------------------------------------------------------------------------------------------------------------------------------------------------------------------------------------------------------------------------------------------------------------------------------------------------------------------------------------------------------------------|
| Journal:                        | <i>BMJ Open</i>                                                                                                                                                                                                                                                                                                                                                                    |
| Manuscript ID:                  | bmjopen-2013-002936                                                                                                                                                                                                                                                                                                                                                                |
| Article Type:                   | Research                                                                                                                                                                                                                                                                                                                                                                           |
| Date Submitted by the Author:   | 22-Mar-2013                                                                                                                                                                                                                                                                                                                                                                        |
| Complete List of Authors:       | Brinsden, Hannah; Queen Mary University of London, Wolfson Institute of Preventive Medicine<br>He, Feng; Queen Mary University of London, Wolfson Institute of Preventive Medicine<br>Jenner, Katharine; Queen Mary University of London, Wolfson Institute of Preventive Medicine<br>MacGregor, Graham; Queen Mary University of London, Wolfson Institute of Preventive Medicine |
| <b>Primary Subject Heading</b>: | Public health                                                                                                                                                                                                                                                                                                                                                                      |
| Secondary Subject Heading:      | Global health, Cardiovascular medicine, Nutrition and metabolism                                                                                                                                                                                                                                                                                                                   |
| Keywords:                       | PUBLIC HEALTH, Coronary heart disease < CARDIOLOGY, NUTRITION & DIETETICS, Health policy < HEALTH SERVICES ADMINISTRATION & MANAGEMENT                                                                                                                                                                                                                                             |
|                                 |                                                                                                                                                                                                                                                                                                                                                                                    |

SCHOLARONE™  
Manuscripts

Only

## Surveys of the salt content in UK bread

### – Progress made and further reductions possible

Hannah C Brinsden, Feng J He, Katharine H Jenner, Graham A MacGregor

Wolfson Institute of Preventive Medicine, Barts and The London School of Medicine & Dentistry, Queen Mary University of London, UK

**Running title:** Salt reduction in UK bread

Correspondence to:

Dr. Feng He

Wolfson Institute of Preventive Medicine,  
Barts and The London School of Medicine & Dentistry,  
Queen Mary University of London,  
Charterhouse Square,  
London EC1M 6BQ.

Tel: 44 (0)20 7882 6266

Fax: 44 (0)20 7882 6270

E-mail: f.he@qmul.ac.uk

## ABSTRACT

Objectives: To explore the salt reductions made over time in packaged bread sold in the UK, the biggest contributor of salt to the UK diet.

Study design: Cross-sectional surveys were carried out on the salt content of breads available in UK supermarkets in 2001(40 products), 2006 (138) and 2011 (203).

Main outcome measures: The primary outcome measure was a change in salt content per 100g over time. Further measures included proportion of products meeting salt targets and differences between brands and bread types.

Results: The average salt level of bread was  $1.23\pm 0.19\text{g}/100\text{g}$  in 2001,  $1.05\pm 0.16$  in 2006, and  $0.98\pm 0.13$  in 2011. This shows a reduction in salt/100g of  $\approx 20\%$  between 2001 and 2011. A significant reduction ( $p < 0.05$ ) was found when identical products were tracked across each year. Supermarket own-brand bread was found to be lower in salt compared to branded bread ( $0.95\text{g}/100\text{g}$  compared to  $1.04\text{g}/100\text{g}$  in 2011). The number of products meeting the 2012 targets increased from 31% in 2001 to 71% in 2011.

Conclusions: This study shows that the salt content of bread has been progressively reduced over time, contributing to the evidence base that a target based approach to salt reduction can lead to reductions being made. A wide variation in salt levels was found with many products already meeting the 2012 targets indicating that further reductions can be made. This requires further progressive targets to be set, so that the UK can continue to lead the world in salt reduction and save the maximum number of lives.

**Key words:** bread, reformulation, public health, food industry, salt, sodium

## ARTICLE SUMMARY

### Article focus:

- Populations around the world are consuming too much salt, largely as a result of the high salt content of processed foods.
- The UK is leading the world in salt reduction through the implementation of progressively lower voluntary salt targets across >80 categories of foods.
- Bread is the largest contributor of salt to the UK diet – this research uses a series of cross-sectional surveys of the salt content in UK packaged bread to examine the reductions made over time and the progress made towards meeting the 1g/100g target.

### Key messages:

- The salt content of bread sold in the UK has been progressively reduced over the last decade.
- The results demonstrate that a target based approach to salt reduction can work to reduce the salt content of popular food.
- Other countries around the world need to follow the UK's lead and set country specific salt targets.

### Strengths and limitations of this study:

- This study is the first of its kind, tracking the salt reductions made in bread over time. The results indicate that progressive lower salt targets can work to reduce salt levels of processed foods and can serve as evidence to encourage other countries around the world to follow this approach to salt reduction.

- The data used was based on manufacturers labels; due to product name changes, trend analysis was only possible for a limited number of products; No ingredient information was collected, so changes in formulations could not be examined.

## FUNDING STATEMENT

This research received no specific grant from any funding agency in the public, commercial or not-for-profit sectors

## COMPETING INTERESTS

HB was an employee of Consensus Action on Salt & Health (CASH), a nonprofit charitable organisation at the time of conducting this study. FH is a member of CASH and its international branch World Action on Salt & Health (WASH) and does not receive any financial support from CASH or WASH. GM is Chairman of Blood Pressure Association (BPA), Chairman of CASH and Chairman of WASH. BPA, CASH and WASH are nonprofit charitable organisations. GM does not receive any financial support from any of these organisations. KJ is Campaign Director at CASH, WASH and BPA.

## INTRODUCTION

There is strong evidence that a high salt intake increases blood pressure and thereby increases the risk of cardiovascular disease (i.e. strokes, heart attacks and heart failure) and kidney disease.<sup>1,2</sup>

A high salt intake also has other harmful effects on health, e.g. increasing the risk of stomach cancer<sup>3</sup> and indirectly linked to obesity.<sup>4</sup> Furthermore, it has been demonstrated that a reduction in population salt intake is one of the most cost-effective measures to improve public health.<sup>5</sup>

1  
2  
3 Populations around the world are consuming salt in quantities that far exceed physiological  
4 requirements.<sup>6</sup> As such, The World Health Organisation (WHO) has recommended salt reduction  
5 as one of the top three priority actions to tackle the non-communicable disease crisis.<sup>7, 8</sup>  
6  
7  
8  
9

10  
11  
12 Approximately 75% of the salt consumed in the UK and other developed countries comes from  
13 processed foods, and is added by food manufacturers prior to consumer purchase.<sup>9</sup> A wide range  
14 of food products contain salt, including everyday foods such as bread, breakfast cereals, sauces  
15 and processed meat.  
16  
17  
18  
19  
20  
21

22  
23  
24 The UK has successfully developed a voluntary salt reduction programme which is considered  
25 one of “the most successful nutrition policies in the UK since the second world war”.<sup>10</sup> First  
26 developed by Consensus Action on Salt & Health (CASH), the strategy involves lowering salt  
27 intakes by a) reducing the salt levels of processed foods by a gradual reduction in the amount of  
28 salt added to the processed foods by 40% and b) reducing salt in cooking/at the table by 40%. In  
29 order to reduce salt intake from the 9.5 g/d to the projected target of 6.0 g/d in adults, the Food  
30 Standards Agency (FSA) then set a series of progressively lower salt targets for over 80  
31 categories of food,<sup>11, 12</sup> which have now been incorporated as part of the Government’s Public  
32 Health Responsibility Salt Pledge.<sup>13</sup> Other countries around the world, including Australia,  
33 America and Canada, are following the UK’s lead and are adopting a similar target based  
34 approach to salt reduction.<sup>14</sup>  
35  
36  
37  
38  
39  
40  
41  
42  
43  
44  
45  
46  
47  
48  
49  
50

51  
52  
53 To date, significant progress has been made by many food manufacturers and retailers in the UK,  
54 with salt content being reduced across the board, including by up to 50% in breakfast cereals,  
55  
56  
57  
58  
59  
60

1  
2  
3 45% in biscuits, 40% in pastry products and 25% in cakes and pasta sauces.<sup>15</sup> Furthermore it has  
4  
5 been reported that less salt is being added at the table by consumers.<sup>16</sup> The average salt intake in  
6  
7 the UK population is steadily decreasing in parallel, with intakes currently estimated at 8.1g/d,<sup>17</sup>  
8  
9 the lowest known accurate figure of any developed country (i.e. measured by 24h urinary sodium  
10  
11 excretion).<sup>6</sup> This represents a 15% reduction from 2001 (9.5g).<sup>18</sup> This reduction is estimated to  
12  
13 be saving ≈9000 lives every year and resulting in major cost-savings to the UK economy of more  
14  
15 than £1.5 billion per year.<sup>19,20</sup>  
16  
17  
18  
19  
20  
21

22 Bread is of particular interest to policymakers wishing to introduce a salt reduction strategy. On  
23  
24 the one hand bread is an important component of the diets around the world.<sup>21,22</sup> In the UK for  
25  
26 instance, National Diet and Nutrition Surveys (NDNS) shows that bread contributes more than  
27  
28 10% of daily intake of protein, thiamine, niacin, folate, iron, zinc, copper and magnesium; one-  
29  
30 fifth of fibre and calcium intakes; and more than one-quarter of manganese intake.<sup>23</sup> However,  
31  
32 the NDNS also indicates that bread is the single largest contributor of salt to the UK diet,  
33  
34 providing almost a fifth (18%) of salt intake from processed foods (i.e. 18% of 75% total intake).  
35  
36 This equates to approximately 1.07g salt per person per day from bread alone. Bread is also the  
37  
38 leading contributor in other countries such as America (7.4%),<sup>24</sup> New Zealand (26%)<sup>25</sup> and  
39  
40 Australia.<sup>26</sup> Reductions in the salt content of bread would therefore have a significant impact on  
41  
42 salt intake and as such has always been a leading focus of the UK's salt reduction strategy.  
43  
44  
45  
46  
47  
48  
49  
50

51 Despite the important role that bread plays in the UK diet, not only as a source of nutrients but as  
52  
53 the leading contributor of salt, very little work has been conducted looking at the changes in the  
54  
55 salt content of bread in the UK.  
56  
57  
58  
59  
60

1  
2  
3  
4  
5  
6 In Australia, where authorities are replicating the UK's salt reduction strategy, a paper published  
7  
8 in 2011 explored the changes to sodium content in Australian and New Zealand bread between  
9  
10 2007 and 2010. The paper reported reductions, although only small, to the salt content of bread  
11  
12 in these countries.<sup>27</sup> Other studies that focus on salt in bread, have tended to focus on practical  
13  
14 issues surrounding salt reduction and exploring the potential. For instance, one study focused on  
15  
16 how sodium may be reduced by increasing potassium levels.<sup>22</sup>  
17  
18  
19  
20  
21

22 Given the importance of bread as a contributor of salt to the UK diet, coupled with perceived  
23  
24 success of the UK's salt reduction campaign, the objective of this paper is to describe the  
25  
26 progress made in reducing the amount of salt added to bread in the UK and discuss the successes  
27  
28 and challenges that lie ahead in the UK in terms of further salt reductions so as to provide  
29  
30 recommendations for both the UK and International Governments on salt reduction programmes.  
31  
32  
33  
34  
35

## 36 **METHODS**

### 37 **Data Collection**

38  
39 Three surveys were carried out, with the first one in 2001, the second one in 2006 and the last  
40  
41 one in 2011. The survey in 2001 was carried out by the FSA<sup>28</sup> and the last two surveys by  
42  
43 CASH.<sup>29, 30</sup> For all surveys, the data collected for each loaf included the company name, product  
44  
45 name, pack weight, serving size, sodium/salt per 100 grams and sodium/salt per portion. When  
46  
47 there were missing figures, they were calculated where possible, e.g. the missing sodium or salt  
48  
49 values were converted by multiplying by 2.5 (sodium to salt) or dividing by 2.5 (salt to sodium).  
50  
51  
52  
53  
54  
55  
56  
57  
58  
59  
60



1  
2  
3 All data was double checked after entry, and a further 5% of entries were checked against the  
4 original source in a random selection of products.  
5  
6  
7  
8  
9

10 *Inclusion/exclusion criteria:* Data were collected from each of the major UK supermarkets (Asda,  
11 Sainsburys, Tesco, Waitrose, Morrisons, The Co-operative and Marks and Spencer) to represent  
12 salt levels of bread in the UK. Packaged sliced loaves of bread were included, including white,  
13 wholemeal, seeded, granary, half and half and brown. Thick and medium sliced breads were  
14 included. When two sizes were available, the standard 800g loaves were used. Data were  
15 collected for supermarket own brand bread and for branded bread products available. 'Special'  
16 breads such as rye and soda bread, ethnic breads and fresh breads were excluded  
17  
18  
19  
20  
21  
22  
23  
24  
25  
26  
27  
28

29 *Product categories:* Products were categorised into one of the following 3 groups: White (all  
30 white standard loaves), Wholemeal (all wholemeal loaves, including seeded/granary wholemeal),  
31 Brown (brown, white granary/seeded, 50:50 and wheatgerm). This was based on the criteria used  
32 for the NDNS data collection.<sup>23</sup> 'Other' breads were excluded as data for these breads was not  
33 collected in earlier surveys. Data was also categorised separately into branded or supermarket  
34 own brand.  
35  
36  
37  
38  
39  
40  
41  
42  
43  
44  
45

## 46 **Statistics**

47  
48 *Comparison among products within each year:* Unpaired T-test was used to compare the levels  
49 of salt between supermarket own brand and branded products within each year. One Way  
50 ANOVA with Bonferroni post hoc adjustment was used to compare the salt levels of different  
51 bread types (brown, white and wholemeal).  
52  
53  
54  
55  
56  
57  
58  
59  
60

1  
2  
3  
4  
5  
6 *Comparison of the same products over the years:* Repeated Measure ANOVA was used to test  
7  
8 whether there was a significant change in salt content of bread over the years. For the purpose of  
9  
10 this comparison, only the products with data available in all 3 surveys were included in analysis.  
11  
12 In 2 places where a product was available in 2001 and 2011 but not 2006, the 2006 figure was  
13  
14 assumed to be the same as 2001.  
15  
16

17  
18  
19  
20 Data are reported as mean, SD, SE as indicated. Significance in all tests carried out was deemed  
21  
22 as being  $p < 0.05$ .  
23  
24  
25

26  
27 *Salt targets:* For each year and category, we calculated the total number and percentage of  
28  
29 products that met the Department of Health's 2012 salt target for bread (i.e.  $\leq 1\text{g}/100\text{g}$ ).<sup>31</sup>  
30  
31  
32

## 33 34 **RESULTS**

### 35 36 **Within year analysis**

37  
38 Table 1 shows the levels of salt in bread for all 3 surveys.  
39  
40  
41  
42

#### 43 44 *2001*

45  
46 A total of 40 bread products met the inclusion criteria. One outlier was excluded from analysis as  
47  
48 the salt level was much lower than all comparable products, and also much lower than those  
49  
50 made by the same company. In the remaining 39 bread products, the average salt level per 100g  
51  
52 was  $1.23 \pm 0.19\text{g}$  with a range of 1.00g to 1.75g. Of the 39 products, 18 were branded, 21 were  
53  
54 supermarket own brand. The salt level was slightly higher in branded compared with  
55  
56  
57  
58  
59  
60

1  
2  
3 supermarket own brand ( $1.27\pm 0.18\text{g}$  vs.  $1.19\pm 0.19\text{g}$ ), but this difference was not statistically  
4  
5 significant ( $p=0.189$ ).  
6  
7

8  
9  
10 Of the 39 products, 22 were white, 7 were brown and 10 were wholemeal. There was no  
11  
12 significant difference in the salt content per 100g of different bread types ( $1.22\pm 0.18\text{g}$ ,  
13  
14  $1.16\pm 0.15\text{g}$ ,  $1.30\pm 0.23\text{g}$  respectively,  $p=0.291$ ).  
15  
16

### 17 18 19 20 *2006*

21  
22 The average salt level per 100g was  $1.05\pm 0.16\text{g}$  with a range of 0.55g to 1.50g. Of the 138  
23  
24 products, 51 were branded products and 87 were supermarket own brand. The salt level in  
25  
26 branded products was significantly higher compared with that in supermarket own brand  
27  
28 ( $1.12\pm 0.13\text{g}$  vs.  $1.02\pm 0.16\text{g}$ ,  $p<0.01$ ).  
29  
30  
31

32  
33  
34 Of the 138 products, 46 were white, 55 were brown and 37 were wholemeal. No significant  
35  
36 difference was found between the salt content per 100g of different bread types ( $1.09\pm 0.15\text{g}$ ,  
37  
38  $1.02\pm 0.18\text{g}$ ,  $1.06\pm 0.11\text{g}$  respectively,  $p=0.104$ ).  
39  
40  
41

### 42 43 44 *2011*

45  
46 The average salt level per 100g was  $0.98\pm 0.13\text{g}$  with a range of 0.58g to 2.03g. Of the 203  
47  
48 products, 78 were branded products and 125 were supermarket own brand. The salt level in  
49  
50 branded products was significantly higher compared with that in supermarket own brand  
51  
52 ( $1.04\pm 0.15\text{g}$  vs.  $0.95\pm 0.10\text{g}$ ,  $p<0.01$ ).  
53  
54  
55  
56  
57  
58  
59  
60

1  
2  
3 Of the 203 products included, 75 were white, 71 were brown and 57 were wholemeal. No  
4  
5 significant difference was found between the salt content per 100g of these groups ( $1.00\pm 0.10\text{g}$ ,  
6  
7  $0.98\pm 0.18\text{g}$ ,  $0.97\pm 0.09\text{g}$  respectively,  $p=0.410$ ).  
8  
9

### 10 11 12 13 **Changes in salt levels in bread over the years**

14  
15 This analysis included only products that had salt levels available in all three surveys (i.e. a total  
16  
17 of 18 products). The average salt levels per 100g were  $1.24\pm 0.16\text{g}$  in 2001,  $1.14\pm 0.25\text{g}$  in 2006  
18  
19 and  $1.03\pm 0.25\text{g}$  in 2011,  $p<0.05$  by repeated measures ANOVA. Note that these averages are  
20  
21 slightly different from those when all products were included in each year and this trend analysis  
22  
23 merely reflects reductions made in the same products rather than overall products available.  
24  
25  
26  
27  
28

### 29 30 **Comparing with the 2012 targets**

31  
32 The 2012 bread target, as part of the Department of Health's Responsibility Deal, is  $\leq 1\text{g}$   
33  
34 salt/100g. In 2001, 30% of products (12/40) met this target, increasing to 52% in 2006 (72/138)  
35  
36 and 71% in 2011 (144/203). A greater number of supermarket own brand products compared to  
37  
38 branded products met this target in all years: 38% compared to 21% in 2001; 71% compared to  
39  
40 20% in 2006; 89% compared to 42% in 2011.  
41  
42  
43  
44  
45

## 46 **DISCUSSION**

47  
48 The UK is currently leading the world with salt reduction using a strategy based on a set of  
49  
50 voluntary targets which promote the gradual reduction of the amount of salt added to processed  
51  
52 foods, in particular those foods that contribute most salt to the UK diet. Our paper, using the  
53  
54 example of the biggest contributor of salt to the UK diet – bread, demonstrates that a national  
55  
56  
57  
58  
59  
60

1  
2  
3 target based approach to reformulation can be a successful method for reducing the content of  
4  
5 salt in processed foods.  
6  
7  
8  
9

### 10 **Significant reductions have been achieved**

11  
12 Our repeated surveys of the same bread products over time demonstrates that significant  
13 reductions have been made in the salt content of bread over the last 10years. Further analysis of  
14 all the breads surveyed in each year shows that the bread on sale in 2011 contains, on average,  
15 20% less salt than the breads surveyed in 2001. The reductions that have been made since 2001  
16 have gone unnoticed by the general public, with no impact on sales or consumer behaviour.  
17 Interestingly, no significant difference in the salt content of white, wholemeal and brown bread  
18 was found, despite the common perception that wholemeal and brown bread are healthier  
19 alternatives to white bread.  
20  
21  
22  
23  
24  
25  
26  
27  
28  
29  
30  
31  
32  
33

34 Branded products were found to contain approximately 10% more salt compared to supermarket  
35 breads in 2011 (1.04g vs. 0.95g,  $p<0.01$ ). Although brands have made similar reductions  
36 compared to supermarkets over the last 10 years (0.23g/100g compared to 0.24g/100g), the  
37 branded products started with a higher level of salt, and brands now need to ensure they make  
38 further reductions to come in line with the lower levels seen in supermarket own brand breads.  
39  
40  
41  
42  
43  
44  
45  
46  
47

48 The fact that supermarket own brand breads have been produced with lower levels of salt  
49 demonstrates that delivering salt reduction appears not to be a technical issue related to bread  
50 manufacture. Corporate decisions about food composition are often based upon factors such as  
51 taste and price, rather than health. However, evidence suggests that where salt reductions are  
52  
53  
54  
55  
56  
57  
58  
59  
60

1  
2  
3 made gradually in bread over time, no reduction in consumer preference is reported.<sup>32,33</sup> Indeed,  
4  
5 a number of studies have shown that gradual reductions can go unnoticed by the consumer. For  
6  
7 instance, a controlled study by Girgis et al<sup>32</sup> found that gradual reductions of up to a quarter in  
8  
9 the salt content of bread over a 6 week period went largely unnoticed and that further reductions  
10  
11 of up to 67% were possible when the bread was served with a sweet or savoury filling. Another  
12  
13 study by Tuorila-Ollikainen et al<sup>34</sup> investigated the effect of salt reduction on bread consumption  
14  
15 over 12 weeks at a lunch restaurant. Regular salted wheat bread was available at the start and end  
16  
17 of the experiment (3-wk periods both) and 31% salt-reduced bread was offered in the 6 wk  
18  
19 between. This study showed unchanged bread consumption when the salt-reduced bread was  
20  
21 offered, which is in line with our results for the whole of the UK.  
22  
23  
24  
25  
26  
27  
28

29 Products specifically promoted as ‘low/no/reduced salt’ are sometimes perceived as having a  
30  
31 different taste. This emphasises the need for widespread industry gradual reductions to reduce  
32  
33 population salt intake, rather than relying on consumers opting for lower salt versions. To ensure  
34  
35 continued consumer acceptance of lower salt foods it is important that all manufacturers,  
36  
37 particularly branded bread manufacturers in the UK, continue to reduce the salt content of their  
38  
39 bread, in line with the levels found in supermarket breads, so as to ensure the greatest benefit for  
40  
41 public health.  
42  
43  
44  
45  
46  
47  
48

### 49 **Implications for global public health and learnings from the UK**

50 Our study demonstrates that a target based gradual approach to salt reduction can be a successful  
51  
52 way to reduce salt in bread. Seventy one percent of the bread products surveyed in 2011 already  
53  
54 met the 2012 targets, compared to just 30% of the surveyed products in 2001. The findings  
55  
56  
57  
58  
59  
60

1  
2  
3 support previous studies that have indicated a reduction in salt in popular household products,  
4 such as a reduction of up to 50% in breakfast cereals, 45% in biscuits, 40% in pastry products  
5 and 25% in cakes and pasta sauces.<sup>15</sup>  
6  
7  
8  
9

10  
11  
12 Such a programme, based on a series of gradual reductions across the sector over a period of  
13 years, can lead to a large cumulative reduction in salt content of foods and therefore in  
14 population salt intakes. Additionally, a program that removes a small amount of salt from every  
15 product reduces salt intake in the whole population starting at one year of age when processed  
16 food products with added salt are introduced. With the need to address social inequalities in  
17 health, both in the UK and worldwide, this programme sees those consuming the largest  
18 quantities of the saltiest foods obtaining the greatest benefits. Programs that target the whole  
19 food chain such as this also have a significant cost advantage because additional consumer  
20 education and behaviour change is not required to achieve results. Furthermore, salt reduction,  
21 and the costs associated with it, can be absorbed into the continuous reformulation programmes  
22 already undertaken by manufacturers and retailers.  
23  
24  
25  
26  
27  
28  
29  
30  
31  
32  
33  
34  
35  
36  
37  
38  
39  
40

41 Despite the fact that clear reductions in salt content in bread are being made in the UK, there is  
42 still a marked variability in the salt levels of similar bread products as well as differences  
43 between branded and supermarket own brand bread. This demonstrates that while a voluntary  
44 target based approach works to encourage industry reductions, the targets needs to be coupled  
45 with the forceful government or quasi-government agency, e.g. in the UK the Food Standards  
46 Agency and subsequently the Department of Health, to ensure all companies are aware of the  
47 targets and make reductions to achieve the same low levels in salt content so as to have the  
48  
49  
50  
51  
52  
53  
54  
55  
56  
57  
58  
59  
60

1  
2  
3 maximum benefit on population health. When countries are looking to set their own targets, they  
4  
5 should make sure that a monitoring strategy is included so that all products are reduced across  
6  
7 the board, and to ensure that companies feel that there is a level playing field. This can be greatly  
8  
9 helped by forceful Non-Government Organisations (e.g. in the UK, CASH) that monitor progress  
10  
11 and highlight companies that are not complying.  
12  
13

14  
15  
16  
17 Technological solutions that enable the production of much lower salt products with no loss in  
18  
19 the sensory characteristics of the food may be closely guarded commercial secrets or require  
20  
21 investment in research and materials that only large businesses can afford. Despite there being  
22  
23 advantages to sharing salt reduction information the competition-based business model does not  
24  
25 lend itself to industry-wide dissemination of innovation. A supporting pledge in the  
26  
27 Responsibility Deal indicates that information should be shared between companies, but more  
28  
29 work could be done and the Department of Health needs to encourage this.  
30  
31  
32  
33  
34  
35

36 High salt diets are not a problem unique to the UK.<sup>6</sup> Other countries have started to follow the  
37  
38 UK's lead by setting some of their own salt reduction targets. In Australia and New Zealand, for  
39  
40 instance, bread targets of 400mg sodium/100g (1g salt /100g) and 450mg sodium/100g (1.13g  
41  
42 salt/100g) respectively were introduced in 2007. Monitoring reports from these countries (2007-  
43  
44 2010) reported a 7% reduction in the salt content of bread in New Zealand, but did not observe a  
45  
46 reduction in Australia. However, during the 3 year period, the proportion of products in each  
47  
48 country meeting the target increased from 29% to 50% in Australia and 49% to 90% in New  
49  
50 Zealand, suggesting that reductions are likely to have occurred not only in New Zealand, but  
51  
52 also in Australia, where reductions may have occurred, but not across the board, To highlight this  
53  
54  
55  
56  
57  
58  
59  
60



1  
2  
3 point, while a reduction of up to 17% was seen in the breads produced by two retailers and one  
4  
5 manufacturer included in the research, an increase of 10% was seen in a fourth company. This  
6  
7 indicates that, while the first step has been taken to reduce salt via a target based approach,  
8  
9 further work in monitoring and engaging all members of the food industry is required to ensure  
10  
11 that salt reduction occurs across the board so as to create a level playing field for all of the  
12  
13 companies involved and also to see the biggest benefits for public health  
14  
15  
16  
17  
18  
19

20 Other countries around the world now need to follow suit and set up a target based approach to  
21  
22 reducing salt content of processed foods. While the food category emphasis may differ between  
23  
24 countries, the concept of using salt targets to achieve a 'level playing field' amongst the industry  
25  
26 is universal. A product like bread is widely consumed internationally and this research  
27  
28 demonstrates how targets can work to lower the levels of salt.  
29  
30  
31  
32  
33

### 34 **LIMITATIONS**

35  
36 Our study was based on salt content data provided on bread labels in store, hence we relied on  
37  
38 the accuracy of the data provided on the label. However, the study carried out by the Food  
39  
40 Standards Agency showed that the analysed figures did match those stated on the labels.<sup>35</sup> It is  
41  
42 assumed that the manufacturers provide accurate and up to date information in line with EU  
43  
44 Regulations.  
45  
46  
47  
48  
49

50  
51 In order to track changes in salt levels over time the same products need to be used for analysis.  
52  
53 However, due to product name changes it was often hard to ensure that all products available  
54  
55 were used as there was no way of determining if a similar named product was a different product  
56  
57  
58  
59  
60

1  
2  
3 or a newly named product. This also means that a limited number of products were used for trend  
4  
5 analysis, but our results from both repeated surveys of the same products and the overall analysis  
6  
7 of all products have consistently shown a reduction in salt levels in bread products on sale in the  
8  
9 UK.  
10  
11

12  
13  
14  
15 When collecting data we did not capture ingredients list, this means we are unable to ascertain if  
16  
17 salt has been replaced with any other ingredients/additives in the bread that came out lowest.  
18  
19 Such data should be collected in future surveys.  
20  
21

22  
23  
24 There is no evidence available to prove that the salt reduction seen in bread has translated into a  
25  
26 reduction in salt intake in the UK population. However, given that there is no evidence of a  
27  
28 change in the sales of bread in the UK, that the salt content of bread has declined and that the salt  
29  
30 intake of the population has declined in parallel, it is likely that the reductions in salt made in  
31  
32 bread have contributed to the measured reductions in population salt intake.  
33  
34  
35  
36  
37

## 38 **CONCLUSION**

39  
40 This research, using the example of bread, demonstrates how a target based approach to salt  
41  
42 reduction can lead to salt reductions being made across the board. There is evidence that  
43  
44 companies could substantially reduce the amount of salt further, based on the variation in salt  
45  
46 levels found. In the meantime however it is important that companies introduce clear and  
47  
48 consistent front of pack labelling across all foods so that consumers can identify lower salt  
49  
50 products.  
51  
52  
53  
54  
55  
56  
57  
58  
59  
60

1  
2  
3 This research presents a clear example of how a salt reduction strategy, based on targets in key  
4 food categories, can ensure that salt levels are reduced without loss of sales and no consumer  
5 reaction. Governments around the world need now to follow the UK's lead and set targets on the  
6 biggest contributors of salt to the diet so as to prevent thousands of deaths every year.  
7  
8  
9  
10  
11  
12

### 13 14 15 16 17 18 **Authors contributions**

19  
20 GM conceived the idea and designed research; HB conducted research; HB and FH analyzed  
21 data; HB wrote the first draft of the manuscript and all authors contributed to the interpretation of  
22 the results and revision of the manuscript, and approved the final manuscript. GM had primary  
23 responsibility for final content.  
24  
25  
26  
27  
28  
29  
30

### 31 32 **Data sharing**

33  
34  
35 No additional data available.  
36  
37  
38  
39

### 40 41 **References**

- 42  
43 1. He, F.J. and G.A. MacGregor, Reducing population salt intake worldwide: from evidence  
44 to implementation. *Prog Cardiovasc Dis.* 2010. 52: p. 363-382.  
45  
46 2. He, F.J. and G.A. MacGregor, Salt reduction lowers cardiovascular risk: meta-analysis of  
47 outcome trials. *Lancet.* 2011. 378: p. 380-382.  
48  
49 3. D'Elia, L., G. Rossi, R. Ippolito, F.P. Cappuccio, and P. Strazzullo, Habitual salt intake  
50 and risk of gastric cancer: A meta-analysis of prospective studies. *Clin Nutr.* 2012. 31: p.  
51 489-498.  
52  
53 4. He, F.J., N.M. Marrero, and G.A. MacGregor, Salt intake is related to soft drink  
54 consumption in children and adolescents: a link to obesity? *Hypertension.* 2008. 51: p.  
55 629-634.  
56  
57  
58  
59  
60

- 1
  - 2
  - 3
  - 4
  - 5
  - 6
  - 7
  - 8
  - 9
  - 10
  - 11
  - 12
  - 13
  - 14
  - 15
  - 16
  - 17
  - 18
  - 19
  - 20
  - 21
  - 22
  - 23
  - 24
  - 25
  - 26
  - 27
  - 28
  - 29
  - 30
  - 31
  - 32
  - 33
  - 34
  - 35
  - 36
  - 37
  - 38
  - 39
  - 40
  - 41
  - 42
  - 43
  - 44
  - 45
  - 46
  - 47
  - 48
  - 49
  - 50
  - 51
  - 52
  - 53
  - 54
  - 55
  - 56
  - 57
  - 58
  - 59
  - 60
5. Asaria, P., D. Chisholm, C. Mathers, M. Ezzati, and R. Beaglehole, Chronic disease prevention: health effects and financial costs of strategies to reduce salt intake and control tobacco use. *Lancet*. 2007. 370: p. 2044-2053.
6. Webster, J.L., E.K. Dunford, C. Hawkes, and B.C. Neal, Salt reduction initiatives around the world. *J Hypertens*. 2011. 29: p. 1043-1050.
7. First global ministerial conference on healthy lifestyles and noncommunicable disease control, 28-29 April 2011, Moscow. [http://www.who.int/nmh/events/moscow\\_ncds\\_2011/en/](http://www.who.int/nmh/events/moscow_ncds_2011/en/) (Access verified 16 May 2011).
8. Beaglehole, R., R. Bonita, R. Horton, C. Adams, G. Alleyne, P. Asaria, V. Baugh, H. Bekedam, N. Billo, S. Casswell, M. Cecchini, R. Colagiuri, S. Colagiuri, T. Collins, S. Ebrahim, M. Engelgau, G. Galea, T. Gaziano, R. Geneau, A. Haines, J. Hospedales, P. Jha, A. Keeling, S. Leeder, P. Lincoln, M. McKee, J. Mackay, R. Magnusson, R. Moodie, M. Mwatsama, S. Nishtar, B. Norrving, D. Patterson, P. Piot, J. Ralston, M. Rani, K.S. Reddy, F. Sassi, N. Sheron, D. Stuckler, I. Suh, J. Torode, C. Varghese, and J. Watt, Priority actions for the non-communicable disease crisis. *Lancet*. 2011. 377: p. 1438-1447.
9. James, W.P., A. Ralph, and C.P. Sanchez-Castillo, The dominance of salt in manufactured food in the sodium intake of affluent societies. *Lancet*. 1987. 1: p. 426-429.
10. Winkler, J.T., Obesity exposé offers slim pickings. *BMJ* 2012. 344: p. e4465 doi: 4410.1136/bmj.e4465.
11. Salt reduction targets: March 2006. London, UK: Food Standards Agency, 2006. Available at <http://www.food.gov.uk/multimedia/pdfs/saltpreventionapril06.pdf> (Accessed August 17, 2012).
12. Food Standards Agency. Agency publishes 2012 salt reduction targets, 8 May 2009. [www.food.gov.uk/news/newsarchive/2009/may/saltprevention](http://www.food.gov.uk/news/newsarchive/2009/may/saltprevention) (Access verified May 28, 2010).
13. Department of Health Responsibility Deal, 27 July 2012, <http://responsibilitydeal.dh.gov.uk/2012/07/27/good-progress-on-salt-reduction/> (Accessed 27 July 2012).
14. The George Institute for Global Health, Australia. New research: time for Australia to target salt, 3 February 2010. <http://www.georgeinstitute.org.au/about-us/media-centre/new-research-time-australia-target-salt> (Accessed 12 march 2013).
15. Wyness, L.A., J.L. Buttriss, and S.A. Stanner, Reducing the population's sodium intake: the UK Food Standards Agency's salt reduction programme. *Public Health Nutr*. 2012. 15: p. 254-261.
16. Sutherland, J., P. Edwards, B. Shankar, and A.D. Dangour, Fewer adults add salt at the table after initiation of a national salt campaign in the UK: a repeated cross-sectional analysis. *Br J Nutr*. 2013: p. 1-7.
17. Department of Health: Assessment of Dietary Sodium Levels Among Adults (aged 19-64) in England, 2011. <http://transparency.dh.gov.uk/2012/06/21/sodium-levels-among-adults/> (Accessed 25 June 2012).

- 1  
2  
3  
4  
5  
6  
7  
8  
9  
10  
11  
12  
13  
14  
15  
16  
17  
18  
19  
20  
21  
22  
23  
24  
25  
26  
27  
28  
29  
30  
31  
32  
33  
34  
35  
36  
37  
38  
39  
40  
41  
42  
43  
44  
45  
46  
47  
48  
49  
50  
51  
52  
53  
54  
55  
56  
57  
58  
59  
60
18. Henderson, L., K. Irving, J. Gregory, C.J. Bates, A. Prentice, J. Perks, G. Swan, and M. Farron, National Diet & Nutrition Survey: Adults aged 19 to 64. 2003. 3: p. 127-136. London: TSO.
  19. National Institute for Health and Clinical Excellence (NICE). Guidance on the prevention of cardiovascular disease at the population level. <http://guidance.nice.org.uk/PH25> (Access verified 14 July 2010).
  20. Ofcom, Office of Communications. Impact assessment. [http://stakeholders.ofcom.org.uk/binaries/consultations/foodads\\_new/ia.pdf](http://stakeholders.ofcom.org.uk/binaries/consultations/foodads_new/ia.pdf) (Access verified 13 July 2010).
  21. A, O.C., An overview of the role of bread in the UK diet. *Nutrition Bulletin*. 2012. 37: p. 193–212.
  22. Quilez, J. and J. Salas-Salvado, Salt in bread in Europe: potential benefits of reduction. *Nutr Rev*. 2012. 70: p. 666-678.
  23. National Diet and Nutrition Survey: Headline results from Years 1 and 2 (combined) of the rolling programme 2008/9 - 2009/10. [http://www.dh.gov.uk/en/Publicationsandstatistics/Publications/PublicationsStatistics/DH\\_128166](http://www.dh.gov.uk/en/Publicationsandstatistics/Publications/PublicationsStatistics/DH_128166) (Accessed 16th August 2012).
  24. CDC, Centers for Disease Control and Prevention: Vital Signs: Food Categories Contributing the Most to Sodium Consumption — United States, 2007–2008. *Morbidity and Mortality Weekly Report (MMWR)*. 2012 61 p. 92-98.
  25. Woodward, E., H. Eyles, and C. Ni Mhurchu, Key opportunities for sodium reduction in New Zealand processed foods. *Aust N Z J Public Health*. 2012. 36: p. 84-89.
  26. Food Standards Australia New Zealand. Proposal P230. Consideration of mandatory fortification with iodine. Canberra: FSANZ, 2007.
  27. Dunford, E.K., H. Eyles, C.N. Mhurchu, J.L. Webster, and B.C. Neal, Changes in the sodium content of bread in Australia and New Zealand between 2007 and 2010: implications for policy. *Med J Aust*. 2011. 195: p. 346-349.
  28. Food Standards Agency, Determination of sodium content of bread, 2001 <http://www.food.gov.uk/science/surveillance/fsis2001/19bread1> (Accessed 27th July 2011).
  29. Consumers advised to use their loaf when choosing bread. <http://www.actiononsalt.org.uk/news/surveys/2011/bread/index.html> (Accessed 17 August 2012).
  30. Survey shows significant variations in salt content of bread. <http://www.actiononsalt.org.uk/news/surveys/2007/bread/index.html> (Accessed 17 August 2012).
  31. Department of Health. Targets <https://www.wp.dh.gov.uk/responsibilitydeal/files/2012/01/Salt-Targets-for-Responsibility-Deal.pdf>.

- 1  
2  
3 32. Girgis, S., B. Neal, J. Prescott, J. Prendergast, S. Dumbrell, C. Turner, and M.  
4 Woodward, A one-quarter reduction in the salt content of bread can be made without  
5 detection. *Eur J Clin Nutr.* 2003. 57: p. 616-620.  
6  
7 33. Liem, D.G., F. Miremadi, and R.S. Keast, Reducing sodium in foods: the effect on flavor.  
8 *Nutrients.* 2011. 3: p. 694-711.  
9  
10 34. TuorilaOllikainen, H., H. Salovaara, and R. Kurkela, Effect of saltiness on the liking and  
11 consumption of bread and butter. *Ecol Food Nutr.* 1986. 18: p. 99-106.  
12  
13 35. Food Standards Agency. Determination of sodium content of bread, 2001.  
14 <http://www.food.gov.uk/science/research/surveillance/fsis2001/19bread1#.UTR-3le80ct>  
15 (Accessed on 4 March 2013).  
16  
17  
18  
19  
20  
21  
22

23 **Legend for figure 1:** Salt content in bread in repeated surveys, 2001-2011  
24  
25  
26  
27  
28  
29  
30  
31  
32  
33  
34  
35  
36  
37  
38  
39  
40  
41  
42  
43  
44  
45  
46  
47  
48  
49  
50  
51  
52  
53  
54  
55  
56  
57  
58  
59  
60

Table 1. Average salt levels in breads for each year (g salt/100g)

|                    | 2001 |                          | 2006 |                          | 2011 |                            |
|--------------------|------|--------------------------|------|--------------------------|------|----------------------------|
|                    | N    | Mean±SD<br>(range)       | N    | Mean±SD<br>(range)       | N    | Mean±SD<br>(range)         |
| <b>Overall</b>     | 39   | 1.23±0.19<br>(1.00-1.75) | 138  | 1.05±0.16<br>(0.55-1.50) | 203  | 0.98± 0.13<br>(0.58-2.03)  |
| <b>Branded</b>     | 18   | 1.27±0.18<br>(1.00-1.50) | 51   | 1.12±0.13<br>(0.55-1.25) | 78   | 1.04 ±0.15<br>(0.75-2.03)  |
| <b>Supermarket</b> | 21   | 1.19±0.19<br>(1.00-1.75) | 87   | 1.02±0.16<br>(0.60-1.50) | 125  | 0.95 ± 0.10<br>(0.58-1.20) |
| <b>White</b>       | 22   | 1.22±0.18<br>(1.00-1.50) | 46   | 1.09±0.15<br>(0.70-1.50) | 75   | 1.00±0.10<br>(0.58-1.20)   |
| <b>Brown</b>       | 7    | 1.16±0.15<br>(1.00-1.35) | 55   | 1.02±0.18<br>(0.55-1.50) | 71   | 0.98±0.18<br>(0.65-2.03)   |
| <b>Wholemeal</b>   | 10   | 1.30±0.23<br>(1.00-1.75) | 37   | 1.06±0.11<br>(0.90-1.30) | 57   | 0.97±0.09<br>(0.74-1.18)   |

Table 2. Products meeting the 2012 target of  $\leq 1$  g salt/100g in each year

|                    | 2001 |                            | 2006 |                            | 2011 |                            |
|--------------------|------|----------------------------|------|----------------------------|------|----------------------------|
|                    | N    | N (%)<br>meeting<br>target | N    | N (%)<br>meeting<br>target | N    | N (%)<br>meeting<br>target |
| <b>Overall</b>     | 40   | 12 (30%)                   | 138  | 72 (52%)                   | 203  | 144 (71%)                  |
| <b>Branded</b>     | 19   | 4 (21%)                    | 51   | 10 (20%)                   | 78   | 33 (42%)                   |
| <b>Supermarket</b> | 21   | 8 (38%)                    | 87   | 62 (71%)                   | 125  | 111 (89%)                  |
| <b>White</b>       | 23   | 7 (30%)                    | 46   | 22 (48%)                   | 75   | 50 (67%)                   |
| <b>Brown</b>       | 7    | 3 (43%)                    | 55   | 31 (56%)                   | 71   | 50 (70%)                   |
| <b>Wholemeal</b>   | 10   | 2 (20%)                    | 37   | 19 (51%)                   | 57   | 44 (77%)                   |



1  
2  
3  
4  
5  
6  
7  
8  
9  
10  
11  
12  
13  
14  
15  
16  
17  
18  
19  
20  
21  
22  
23  
24  
25  
26  
27  
28  
29  
30  
31  
32  
33  
34  
35  
36  
37  
38  
39  
40  
41  
42  
43  
44  
45  
46  
47  
48  
49  
50  
51  
52  
53  
54  
55  
56  
57  
58  
59  
60

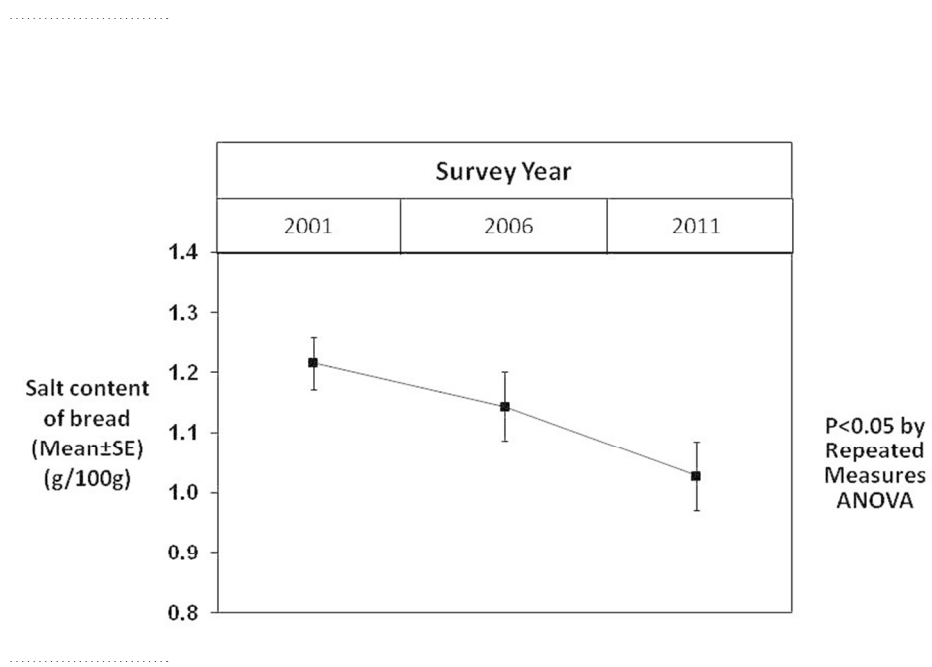

254x190mm (96 x 96 DPI)

Review only

## STROBE Statement—checklist of items that should be included in reports of observational studies

|                           | Item No | Recommendation                                                                                                                                                                                                                                                                                                                                                                                                                                                         | Page Number Reported |
|---------------------------|---------|------------------------------------------------------------------------------------------------------------------------------------------------------------------------------------------------------------------------------------------------------------------------------------------------------------------------------------------------------------------------------------------------------------------------------------------------------------------------|----------------------|
| <b>Title and abstract</b> | 1       | (a) Indicate the study's design with a commonly used term in the title or the abstract                                                                                                                                                                                                                                                                                                                                                                                 | 2                    |
|                           |         | (b) Provide in the abstract an informative and balanced summary of what was done and what was found                                                                                                                                                                                                                                                                                                                                                                    | 2                    |
| <b>Introduction</b>       |         |                                                                                                                                                                                                                                                                                                                                                                                                                                                                        |                      |
| Background/rationale      | 2       | Explain the scientific background and rationale for the investigation being reported                                                                                                                                                                                                                                                                                                                                                                                   | 4-5                  |
| Objectives                | 3       | State specific objectives, including any prespecified hypotheses                                                                                                                                                                                                                                                                                                                                                                                                       | 5                    |
| <b>Methods</b>            |         |                                                                                                                                                                                                                                                                                                                                                                                                                                                                        |                      |
| Study design              | 4       | Present key elements of study design early in the paper                                                                                                                                                                                                                                                                                                                                                                                                                | 5                    |
| Setting                   | 5       | Describe the setting, locations, and relevant dates, including periods of recruitment, exposure, follow-up, and data collection                                                                                                                                                                                                                                                                                                                                        | 5-6                  |
| Participants              | 6       | (a) <i>Cohort study</i> —Give the eligibility criteria, and the sources and methods of selection of participants. Describe methods of follow-up<br><i>Case-control study</i> —Give the eligibility criteria, and the sources and methods of case ascertainment and control selection. Give the rationale for the choice of cases and controls<br><i>Cross-sectional study</i> —Give the eligibility criteria, and the sources and methods of selection of participants | Not applicable       |
|                           |         | (b) <i>Cohort study</i> —For matched studies, give matching criteria and number of exposed and unexposed<br><i>Case-control study</i> —For matched studies, give matching criteria and the number of controls per case                                                                                                                                                                                                                                                 | Not applicable       |
| Variables                 | 7       | Clearly define all outcomes, exposures, predictors, potential confounders, and effect modifiers. Give diagnostic criteria, if applicable                                                                                                                                                                                                                                                                                                                               | 6-7                  |
| Data sources/measurement  | 8*      | For each variable of interest, give sources of data and details of methods of assessment (measurement). Describe comparability of assessment methods if there is more than one group                                                                                                                                                                                                                                                                                   | 5                    |
| Bias                      | 9       | Describe any efforts to address potential sources of bias                                                                                                                                                                                                                                                                                                                                                                                                              | 6                    |
| Study size                | 10      | Explain how the study size was arrived at                                                                                                                                                                                                                                                                                                                                                                                                                              | Not applicable       |
| Quantitative variables    | 11      | Explain how quantitative variables were handled in the analyses. If applicable, describe which groupings were chosen and why                                                                                                                                                                                                                                                                                                                                           | 6                    |
| Statistical methods       | 12      | (a) Describe all statistical methods, including those used to control for confounding                                                                                                                                                                                                                                                                                                                                                                                  | 6-7                  |
|                           |         | (b) Describe any methods used to examine subgroups and interactions                                                                                                                                                                                                                                                                                                                                                                                                    | 6                    |
|                           |         | (c) Explain how missing data were addressed                                                                                                                                                                                                                                                                                                                                                                                                                            | 7                    |
|                           |         | (d) <i>Cohort study</i> —If applicable, explain how loss to follow-up was addressed<br><i>Case-control study</i> —If applicable, explain how matching of cases and controls was addressed<br><i>Cross-sectional study</i> —If applicable, describe analytical methods taking                                                                                                                                                                                           | Not applicable       |

|                          |     |                                                                                                                                                                                                              |                |
|--------------------------|-----|--------------------------------------------------------------------------------------------------------------------------------------------------------------------------------------------------------------|----------------|
|                          |     | account of sampling strategy                                                                                                                                                                                 |                |
|                          |     | (e) Describe any sensitivity analyses                                                                                                                                                                        | 6              |
| <b>Results</b>           |     |                                                                                                                                                                                                              |                |
| Participants             | 13* | (a) Report numbers of individuals at each stage of study—eg numbers potentially eligible, examined for eligibility, confirmed eligible, included in the study, completing follow-up, and analysed            | Not applicable |
|                          |     | (b) Give reasons for non-participation at each stage                                                                                                                                                         | Not applicable |
|                          |     | (c) Consider use of a flow diagram                                                                                                                                                                           | Not applicable |
| Descriptive data         | 14* | (a) Give characteristics of study participants (eg demographic, clinical, social) and information on exposures and potential confounders                                                                     | 7-9            |
|                          |     | (b) Indicate number of participants with missing data for each variable of interest                                                                                                                          | 7-9            |
|                          |     | (c) <i>Cohort study</i> —Summarise follow-up time (eg, average and total amount)                                                                                                                             | 9              |
| Outcome data             | 15* | <i>Cohort study</i> —Report numbers of outcome events or summary measures over time                                                                                                                          | 9              |
|                          |     | <i>Case-control study</i> —Report numbers in each exposure category, or summary measures of exposure                                                                                                         | 7-9            |
|                          |     | <i>Cross-sectional study</i> —Report numbers of outcome events or summary measures                                                                                                                           | Not applicable |
| Main results             | 16  | (a) Give unadjusted estimates and, if applicable, confounder-adjusted estimates and their precision (eg, 95% confidence interval). Make clear which confounders were adjusted for and why they were included | 7-9            |
|                          |     | (b) Report category boundaries when continuous variables were categorized                                                                                                                                    | Tab 1          |
|                          |     | (c) If relevant, consider translating estimates of relative risk into absolute risk for a meaningful time period                                                                                             | Not applicable |
| Other analyses           | 17  | Report other analyses done—eg analyses of subgroups and interactions, and sensitivity analyses                                                                                                               | 7-9 & Tab 1    |
| <b>Discussion</b>        |     |                                                                                                                                                                                                              |                |
| Key results              | 18  | Summarise key results with reference to study objectives                                                                                                                                                     | 9-10           |
| Limitations              | 19  | Discuss limitations of the study, taking into account sources of potential bias or imprecision. Discuss both direction and magnitude of any potential bias                                                   | 13             |
| Interpretation           | 20  | Give a cautious overall interpretation of results considering objectives, limitations, multiplicity of analyses, results from similar studies, and other relevant evidence                                   | 11 & 14        |
| Generalisability         | 21  | Discuss the generalisability (external validity) of the study results                                                                                                                                        | 11-14          |
| <b>Other information</b> |     |                                                                                                                                                                                                              |                |
| Funding                  | 22  | Give the source of funding and the role of the funders for the present study and, if applicable, for the original study on which the present article is based                                                | 15             |

\*Give information separately for cases and controls in case-control studies and, if applicable, for exposed and unexposed groups in cohort and cross-sectional studies.

**Note:** An Explanation and Elaboration article discusses each checklist item and gives methodological background and published examples of transparent reporting. The STROBE checklist is best used in conjunction with this article (freely available on the Web sites of PLoS Medicine at <http://www.plosmedicine.org/>, Annals of Internal Medicine at <http://www.annals.org/>, and Epidemiology at <http://www.epidem.com/>). Information on the STROBE Initiative is available at [www.strobe-statement.org](http://www.strobe-statement.org).

For peer review only

1  
2  
3  
4  
5  
6  
7  
8  
9  
10  
11  
12  
13  
14  
15  
16  
17  
18  
19  
20  
21  
22  
23  
24  
25  
26  
27  
28  
29  
30  
31  
32  
33  
34  
35  
36  
37  
38  
39  
40  
41  
42  
43  
44  
45  
46  
47  
48  
49  
50  
51  
52  
53  
54  
55  
56  
57  
58  
59  
60

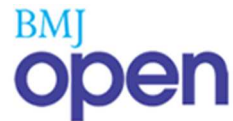

**Surveys of the salt content in UK bread – Progress made  
and further reductions possible**

|                                 |                                                                                                                                                                                                                                                                                                                                                                                    |
|---------------------------------|------------------------------------------------------------------------------------------------------------------------------------------------------------------------------------------------------------------------------------------------------------------------------------------------------------------------------------------------------------------------------------|
| Journal:                        | <i>BMJ Open</i>                                                                                                                                                                                                                                                                                                                                                                    |
| Manuscript ID:                  | bmjopen-2013-002936.R1                                                                                                                                                                                                                                                                                                                                                             |
| Article Type:                   | Research                                                                                                                                                                                                                                                                                                                                                                           |
| Date Submitted by the Author:   | 02-May-2013                                                                                                                                                                                                                                                                                                                                                                        |
| Complete List of Authors:       | Brinsden, Hannah; Queen Mary University of London, Wolfson Institute of Preventive Medicine<br>He, Feng; Queen Mary University of London, Wolfson Institute of Preventive Medicine<br>Jenner, Katharine; Queen Mary University of London, Wolfson Institute of Preventive Medicine<br>MacGregor, Graham; Queen Mary University of London, Wolfson Institute of Preventive Medicine |
| <b>Primary Subject Heading</b>: | Public health                                                                                                                                                                                                                                                                                                                                                                      |
| Secondary Subject Heading:      | Global health, Cardiovascular medicine, Nutrition and metabolism                                                                                                                                                                                                                                                                                                                   |
| Keywords:                       | PUBLIC HEALTH, Coronary heart disease < CARDIOLOGY, NUTRITION & DIETETICS, Health policy < HEALTH SERVICES ADMINISTRATION & MANAGEMENT                                                                                                                                                                                                                                             |
|                                 |                                                                                                                                                                                                                                                                                                                                                                                    |

SCHOLARONE™  
Manuscripts

Only

## Surveys of the salt content in UK bread

### – Progress made and further reductions possible

Hannah C Brinsden, Feng J He, Katharine H Jenner, Graham A MacGregor

Wolfson Institute of Preventive Medicine, Barts and The London School of Medicine & Dentistry, Queen Mary University of London, UK

**Running title:** Salt reduction in UK bread

Correspondence to:

Dr. Feng He

Wolfson Institute of Preventive Medicine,  
Barts and The London School of Medicine & Dentistry,  
Queen Mary University of London,  
Charterhouse Square,  
London EC1M 6BQ.

Tel: 44 (0)20 7882 6266

Fax: 44 (0)20 7882 6270

E-mail: f.he@qmul.ac.uk

## ABSTRACT

Objectives: To explore the salt reductions made over time in packaged bread sold in the UK, the biggest contributor of salt to the UK diet.

Study design: Cross-sectional surveys were carried out on the salt content of breads available in UK supermarkets in 2001(40 products), 2006 (138) and 2011 (203).

Main outcome measures: The primary outcome measure was the change in salt content per 100g over time. Further measures included proportion of products meeting salt targets and differences between brands and bread types.

Results: The average salt level of bread was  $1.23\pm 0.19\text{g}/100\text{g}$  in 2001,  $1.05\pm 0.16$  in 2006, and  $0.98\pm 0.13$  in 2011. This shows a reduction in salt/100g of  $\approx 20\%$  between 2001 and 2011. In the 18 products which were surveyed in all three years, there was a significant reduction of 17% ( $p < 0.05$ ). Supermarket own-brand bread was found to be lower in salt compared to branded bread ( $0.95\text{g}/100\text{g}$  compared to  $1.04\text{g}/100\text{g}$  in 2011). The number of products meeting the 2012 targets increased from 31% in 2001 to 71% in 2011 ( $P < 0.001$ ).

Conclusions: This study shows that the salt content of bread has been progressively reduced over time, contributing to the evidence base that a target based approach to salt reduction can lead to reductions being made. A wide variation in salt levels was found with many products already meeting the 2012 targets indicating that further reductions can be made. This requires further progressive lower targets to be set, so that the UK can continue to lead the world in salt reduction and save the maximum number of lives.

**Key words:** bread, reformulation, public health, food industry, salt, sodium

## ARTICLE SUMMARY

### Article focus:

- Populations around the world are consuming too much salt, largely as a result of the high salt content of processed foods.
- The UK is leading the world in salt reduction through the implementation of progressively lower voluntary salt targets across >80 categories of foods.
- Bread is the largest contributor of salt to the UK diet – this research uses a series of cross-sectional surveys of the salt content in UK packaged bread to examine the reductions made over time and the progress made towards meeting the 1g/100g target.

### Key messages:

- The salt content of bread sold in the UK has been progressively reduced over the last decade.
- The results demonstrate that a target based approach to salt reduction can work to reduce the salt content of popular food.
- Other countries around the world need to follow the UK's lead and set salt targets.

### Strengths and limitations of this study:

- This study tracks the salt reductions made in bread over time. It is the first UK study of this kind, adding to research using the same methodology carried out in Australia and New Zealand. The results indicate that progressive lower salt targets can work to reduce salt levels of processed foods and can serve as evidence to encourage other countries around the world to follow this approach to salt reduction.



- The data used was based on manufacturers labels; due to product name changes, trend analysis was only possible for a limited number of products; No ingredient information was collected, so changes in formulations could not be examined.

## FUNDING STATEMENT

This research received no specific grant from any funding agency in the public, commercial or not-for-profit sectors

## COMPETING INTERESTS

HB was an employee of Consensus Action on Salt & Health (CASH), a nonprofit charitable organisation at the time of conducting this study. FH is a member of CASH and its international branch World Action on Salt & Health (WASH) and does not receive any financial support from CASH or WASH. GM is Chairman of Blood Pressure Association (BPA), Chairman of CASH and Chairman of WASH. BPA, CASH and WASH are nonprofit charitable organisations. GM does not receive any financial support from any of these organisations. KJ is Campaign Director at CASH, WASH and BPA.

## INTRODUCTION

There is strong evidence that a high salt intake increases blood pressure and thereby increases the risk of cardiovascular disease (i.e. strokes, heart attacks and heart failure) and kidney disease.<sup>1 2</sup>

A high salt intake also has other harmful effects on health, e.g. increasing the risk of stomach cancer<sup>3</sup> and indirectly linked to obesity.<sup>4</sup> Furthermore, it has been demonstrated that a reduction in population salt intake is one of the most cost-effective measures to improve public health.<sup>5</sup>

1  
2  
3 Populations around the world are consuming salt in quantities that far exceed physiological  
4 requirements.<sup>6</sup> As such, The World Health Organisation (WHO) has recommended salt reduction  
5 as one of the top three priority actions to tackle the non-communicable disease crisis.<sup>7 8</sup>  
6  
7  
8  
9

10  
11  
12 Approximately 75% of the salt consumed in the UK and other developed countries comes from  
13 processed foods, and is added by food manufacturers prior to consumer purchase.<sup>9</sup> A wide range  
14 of food products contain salt, including everyday foods such as bread, breakfast cereals, sauces  
15 and processed meat.  
16  
17  
18  
19  
20

21  
22  
23  
24 The UK has successfully developed a voluntary salt reduction programme which is considered  
25 one of “the most successful nutrition policies in the UK since the second world war”.<sup>10</sup> First  
26 developed by Consensus Action on Salt & Health (CASH), the strategy involves lowering salt  
27 intakes by a) reducing the salt levels of processed foods by a gradual reduction in the amount of  
28 salt added to the processed foods by 40% and b) reducing salt in cooking or at the table by 40%.  
29  
30  
31  
32  
33  
34  
35  
36  
37 In order to reduce salt intake from the 9.5 g/d to the projected target of 6.0 g/d in adults, the Food  
38 Standards Agency (FSA) then set a series of progressively lower salt targets for over 80  
39 categories of food,<sup>11 12</sup> which have now been incorporated as part of the Government’s Public  
40 Health Responsibility Salt Pledge.<sup>13</sup> Other countries around the world, including Australia,  
41  
42  
43  
44  
45  
46  
47  
48  
49  
50  
51  
52  
53  
54  
55  
56  
57  
58  
59  
60

53 To date, significant progress has been made by many food manufacturers and retailers in the UK,  
54 with salt content being reduced across the board, including by up to 50% in breakfast cereals,  
55  
56  
57  
58  
59  
60

1  
2  
3 45% in biscuits, 40% in pastry products and 25% in cakes and pasta sauces.<sup>14</sup> Furthermore, it has  
4  
5 been reported that less salt is being added at the table by consumers.<sup>15</sup> The average salt intake in  
6  
7 the UK population is steadily decreasing in parallel, with intakes currently estimated at 8.1g/d,<sup>16</sup>  
8  
9 the lowest known accurate figure of any developed country (i.e. measured by 24h urinary sodium  
10  
11 excretion).<sup>6</sup> This represents a 15% reduction from 2001 (9.5g).<sup>17</sup> This reduction is estimated to  
12  
13 be saving ≈9000 lives every year and resulting in major cost-savings to the UK economy of more  
14  
15 than £1.5 billion per year.<sup>18 19</sup>

20  
21  
22 Bread is of particular interest to policymakers wishing to introduce a salt reduction strategy. On  
23  
24 the one hand bread is an important component of the diets around the world.<sup>20 21</sup> In the UK for  
25  
26 instance, National Diet and Nutrition Surveys (NDNS) shows that bread contributes more than  
27  
28 10% of daily intake of protein, thiamine, niacin, folate, iron, zinc, copper and magnesium; one-  
29  
30 fifth of fibre and calcium intakes; and more than one-quarter of manganese intake.<sup>22</sup> However,  
31  
32 the NDNS also indicates that bread is the single largest contributor of salt to the UK diet,  
33  
34 providing almost a fifth (18%) of salt intake from processed foods (i.e. 18% of 75% total intake).  
35  
36 This equates to approximately 1.07g salt per person per day from bread alone. Bread is also the  
37  
38 leading contributor in other countries such as United States (7.4%),<sup>23</sup> New Zealand (26%)<sup>24 25</sup>  
39  
40 and Australia (≈20%).<sup>26 27</sup> Reductions in the salt content of bread would therefore have a  
41  
42 significant impact on salt intake and as such has always been a leading focus of the UK's salt  
43  
44 reduction strategy.  
45  
46  
47  
48  
49  
50  
51  
52  
53  
54  
55  
56  
57  
58  
59  
60

1  
2  
3 Despite the important role that bread plays in the UK diet, not only as a source of nutrients but as  
4  
5 the leading contributor of salt, very little work has been conducted looking at the changes in the  
6  
7 salt content of bread in the UK.  
8  
9

10  
11  
12 In Australia, where authorities are replicating the UK's salt reduction strategy, a paper published  
13  
14 in 2011 explored the changes to sodium content in Australian and New Zealand bread between  
15  
16 2007 and 2010. The paper reported reductions, although only small, to the salt content of bread  
17  
18 in these countries.<sup>27</sup> Other studies that focus on salt in bread, have tended to focus on practical  
19  
20 issues related to salt reduction, including technical feasibility and the potential for use of salt  
21  
22 replacers.. For instance, one study focused on how sodium may be reduced by increasing  
23  
24 potassium levels.<sup>21</sup>  
25  
26  
27  
28  
29  
30  
31

32 Given the importance of bread as a contributor of salt to the UK diet, coupled with perceived  
33  
34 success of the UK's salt reduction campaign, the objective of this paper is to describe the  
35  
36 progress made in reducing the amount of salt added to bread in the UK and discuss the successes  
37  
38 and challenges that lie ahead in the UK in terms of further salt reductions so as to provide  
39  
40 recommendations for both the UK and International Governments on salt reduction programmes.  
41  
42  
43  
44

## 45 **METHODS**

### 46 **Data Collection**

47  
48 Three surveys were carried out, with the first one in 2001, the second one in 2006 and the last  
49  
50 one in 2011. The survey in 2001 was carried out by the FSA<sup>28 29</sup> and the last two surveys by  
51  
52 CASH.<sup>30 31</sup> For all surveys, the data was collected from product packaging and nutrient  
53  
54  
55  
56  
57  
58  
59  
60

1  
2  
3 information panels. The 2011 survey was designed as a comprehensive survey of all breads  
4 available in a snapshot in time, using one large store per retailer in the UK. The 2006 survey was  
5 also designed as a comprehensive survey, but excluded 'repetition' products e.g. where there  
6 were two similar products, for instance two crusty white products, by the same company, or  
7 where the same product was available in different sizes. The FSA survey carried out in 2001 was  
8 not designed as a comprehensive survey, instead including a single example of a premium and  
9 standard white, brown and wholemeal loaf from each of the leading supermarkets and brands.  
10 Whilst not comprehensive, the selection of generic products from a number of companies is  
11 likely to ensure that the data collected is reflective of the situation at that point in time. For each  
12 loaf, the data collected included the company name, product name, pack weight, serving size,  
13 sodium/salt per 100 grams and sodium/salt per portion. When there were missing figures, they  
14 were calculated where possible, e.g. the missing sodium or salt values were converted by  
15 multiplying by 2.5 (sodium to salt) or dividing by 2.5 (salt to sodium). All data was double  
16 checked after entry, and a further 5% of entries were checked against the original source in a  
17 random selection of products.  
18  
19  
20  
21  
22  
23  
24  
25  
26  
27  
28  
29  
30  
31  
32  
33  
34  
35  
36  
37  
38  
39  
40

41 *Inclusion/exclusion criteria:* Data were collected from each of the major UK supermarkets (Asda,  
42 Sainsburys, Tesco, Waitrose, Morrisons, The Co-operative and Marks and Spencer) to represent  
43 salt levels of bread in the UK. Packaged sliced loaves of bread were included, including white,  
44 wholemeal, seeded, granary, half and half, and brown. Thick and medium sliced breads were  
45 included. When two sizes were available, the standard 800g loaves were used. Data were  
46 collected for supermarket own brand bread and for branded bread products available. 'Special'  
47 breads such as rye and soda bread, ethnic breads and fresh breads were excluded  
48  
49  
50  
51  
52  
53  
54  
55  
56  
57  
58  
59  
60

1  
2  
3  
4  
5  
6 *Product categories:* Products were categorised into one of the following 3 groups: White (all  
7 white standard loaves), Wholemeal (all wholemeal loaves, including wholemeal seeded/granary),  
8 Brown (brown, white granary/seeded, 50:50 and wheatgerm). This was based on the criteria used  
9 for the NDNS data collection.<sup>22</sup> ‘Other’ breads were excluded as data for these breads was not  
10 collected in earlier surveys. Data was also categorised separately into branded or supermarket  
11 own brand.  
12  
13  
14  
15  
16  
17  
18  
19  
20  
21

## 22 **Statistics**

23  
24  
25  
26  
27 *Comparison among products within each year:* Unpaired T-test was used to compare the levels  
28 of salt between supermarket own brand and branded products within each year. One Way  
29 ANOVA with Bonferroni post hoc adjustment was used to compare the salt levels of different  
30 bread types (brown, white and wholemeal).  
31  
32  
33  
34  
35  
36  
37  
38

39 *Comparison of the same products over the years:* Repeated Measure ANOVA was used to test  
40 whether there was a significant change in salt content of bread over the years. For the purpose of  
41 this comparison, only the products with data available in all 3 surveys were included in analysis.  
42  
43  
44  
45  
46 In 2 places where a product was available in 2001 and 2011 but not 2006, the 2006 figure was  
47 assumed to be the same as 2001.  
48  
49  
50  
51  
52

53 Data are reported as mean, SD, SE as indicated. Significance in all tests carried out was deemed  
54 as being  $p < 0.05$ . All data was analysed using SPSS software.  
55  
56  
57  
58  
59  
60

1  
2  
3  
4  
5  
6  
7  
8  
9  
10  
11  
12  
13  
14  
15  
16  
17  
18  
19  
20  
21  
22  
23  
24  
25  
26  
27  
28  
29  
30  
31  
32  
33  
34  
35  
36  
37  
38  
39  
40  
41  
42  
43  
44  
45  
46  
47  
48  
49  
50  
51  
52  
53  
54  
55  
56  
57  
58  
59  
60

*Salt targets:* For each year and category, we calculated the total number and percentage of products that met the Department of Health's 2012 salt target for bread (i.e.  $\leq 1\text{g}/100\text{g}$ ).<sup>32</sup>

## RESULTS

### Within year analysis

Table 1 shows the levels of salt in bread for all 3 surveys.

#### 2001

A total of 40 bread products met the inclusion criteria. One outlier was excluded from analysis as the salt level was much lower than all comparable products, and also much lower than those made by the same company. In the remaining 39 bread products, the average salt level per 100g was  $1.23\pm 0.19\text{g}$  with a range of 1.00g to 1.75g.

Table 1 shows the mean salt level for branded and supermarket, as well as salt level by bread type (white, brown and wholemeal). The salt level was slightly higher in branded compared with supermarket own brand, but this difference was not statistically significant ( $p=0.189$ ). There was no significant difference in the salt content per 100g of different bread types ( $p=0.291$ ).

#### 2006

The average salt level per 100g was  $1.05\pm 0.16\text{g}$  with a range of 0.55g to 1.50g. Of the 138 products, 51 were branded products and 87 were supermarket own brand. The salt level in branded products was significantly higher compared with that in supermarket own brand

1  
2  
3 (p<0.01) (Table 1). No significant difference was found between the salt content per 100g of  
4  
5 different bread types (p=0.104) (Table 1).  
6  
7  
8  
9

10  
11 *2011*

12 The average salt level per 100g was 0.98±0.13g with a range of 0.58g to 2.03g. Of the 203  
13 products, 78 were branded products and 125 were supermarket own brand. The salt level in  
14 branded products was significantly higher compared with that in supermarket own brand  
15 (p<0.01) (Table 1). No significant difference was found between the salt content per 100g of  
16 different bread types (p=0.410) (Table 1).  
17  
18  
19  
20  
21  
22  
23  
24  
25  
26

### 27 **Changes in salt levels in bread over the years**

28  
29 Taking all products together, there was a gradual reduction in the salt content of bread. On  
30 average, salt level was reduced by 20% from 2001 to 2011.  
31  
32  
33  
34  
35

36 There were 18 products from 9 different companies that had salt levels surveyed in all three  
37 years. Ten of the bread products were white, and 8 were wholemeal. Eight of the products were  
38 branded and 10 were from retailers. The average salt levels per 100g for these 18 products were  
39 1.24±0.16g in 2001, 1.14±0.25g in 2006 and 1.03±0.25g in 2011 (p<0.05 by repeated measures  
40 ANOVA). This represents a reduction of 17% from 2001 to 2011. Note that these averages are  
41 slightly different from those when all products were included in each year and this trend analysis  
42 merely reflects reductions made in the same products rather than overall products available.  
43  
44  
45  
46  
47  
48  
49  
50  
51  
52  
53  
54

### 55 **Comparing with the 2012 targets**



1  
2  
3 The 2012 bread target, as part of the Department of Health's Responsibility Deal, is  $\leq 1\text{g}$   
4 salt/100g. Our results showed that, from 2001 to 2011, there was a significant increase in the  
5 number of products meeting the 2012 targets (Table 2). In 2001, 30% of products (12/40) met  
6 this target, increasing to 52% in 2006 (72/138) and 71% in 2011 (144/203). A greater number of  
7 supermarket own brand products compared to branded products met this target in all years: 38%  
8 compared to 21% in 2001; 71% compared to 20% in 2006; 89% compared to 42% in 2011.  
9  
10  
11  
12  
13  
14  
15  
16  
17  
18  
19

## 20 **DISCUSSION**

21  
22 The UK is currently leading the world with salt reduction using a strategy, developed in 2003 by  
23 the UK Food Standards Agency and CASH, based on a set of voluntary targets which promote  
24 the gradual reduction in the amount of salt added to processed foods, in particular those foods  
25 that contribute most salt to the UK diet. Our paper, using the example of the biggest contributor  
26 of salt to the UK diet – bread, demonstrates that a national target based approach to  
27 reformulation can be a successful method for reducing the salt content in processed foods.  
28  
29  
30  
31  
32  
33  
34  
35  
36  
37  
38

### 39 **Significant reductions have been achieved**

40  
41 Our repeated surveys of the same bread products over time demonstrates that significant  
42 reductions have been made in the salt content of bread and that there has been a significant  
43 increase in the number of products that meet the salt targets over the last 10years. Further  
44 analysis of all the breads surveyed in each year shows that the bread on sale in 2011 contains, on  
45 average, 20% less salt than the breads surveyed in 2001. The reductions that have been made  
46 since 2001 have gone unnoticed by the general public, with no impact on sales or consumer  
47 behaviour.<sup>33</sup> Interestingly, no significant difference in the salt content of white, wholemeal and  
48  
49  
50  
51  
52  
53  
54  
55  
56  
57  
58  
59  
60

1  
2  
3 brown bread was found, despite the common perception that wholemeal and brown bread are  
4 healthier alternatives to white bread.<sup>34</sup>  
5  
6  
7  
8  
9

10 Branded products were found to contain approximately 10% more salt compared to supermarket  
11 breads in 2011 (1.04g vs. 0.95g,  $p<0.01$ ). Although brands have made similar reductions  
12 compared to supermarkets over the last 10 years (0.23g/100g compared to 0.24g/100g), the  
13 branded products started with a higher level of salt, and brands now need to ensure they make  
14 further reductions to come in line with the lower levels seen in supermarket own brand breads.  
15  
16  
17  
18  
19  
20  
21  
22  
23

24 The fact that supermarket own brand breads have been produced with lower levels of salt  
25 demonstrates that delivering salt reduction appears not to be a technical issue related to bread  
26 manufacture. Corporate decisions about food composition are often based upon factors such as  
27 taste and price, rather than health. However, evidence suggests that where salt reductions are  
28 made gradually in bread over time, no reduction in consumer preference is reported.<sup>35 36</sup> Indeed,  
29 a number of studies have shown that gradual reductions can go unnoticed by the consumer. For  
30 instance, a controlled study by Girgis et al<sup>35</sup> found that gradual reductions of up to a quarter in  
31 the salt content of bread over a 6 week period went largely unnoticed and that further reductions  
32 of up to 67% were possible when the bread was served with a sweet or savoury filling. Another  
33 study by Tuorila-Ollikainen et al<sup>37</sup> investigated the effect of salt reduction on bread consumption  
34 over 12 weeks at a lunch restaurant. Regular salted wheat bread was available at the start and end  
35 of the experiment (3-wk periods both) and 31% salt-reduced bread was offered in the 6 wk  
36 between. This study showed unchanged bread consumption when the salt-reduced bread was  
37 offered.  
38  
39  
40  
41  
42  
43  
44  
45  
46  
47  
48  
49  
50  
51  
52  
53  
54  
55  
56  
57  
58  
59  
60

1  
2  
3  
4  
5  
6 Products specifically promoted as ‘low/no/reduced salt’ are sometimes perceived as having a  
7  
8 different taste.<sup>38</sup> This emphasises the need for widespread industry gradual reductions to reduce  
9  
10 population salt intake, rather than relying on consumers opting for lower salt versions. To ensure  
11  
12 continued consumer acceptance of lower salt foods it is important that all manufacturers,  
13  
14 particularly branded bread manufacturers in the UK, continue to reduce the salt content of their  
15  
16 bread, in line with the levels found in supermarket breads, so as to ensure the greatest benefit for  
17  
18 public health.  
19  
20  
21  
22  
23

### 24 **Implications for global public health and learnings from the UK**

25  
26  
27 Our findings support previous studies that have indicated a reduction in salt in popular household  
28  
29 products, such as a reduction of up to 50% in breakfast cereals, 45% in biscuits, 40% in pastry  
30  
31 products and 25% in cakes and pasta sauces.<sup>14</sup>  
32  
33  
34  
35

36  
37 A programme, based on a series of gradual reductions across the sector over a period of years,  
38  
39 can lead to a large cumulative reduction in salt content of foods and therefore in population salt  
40  
41 intakes. Additionally, a program that removes a small amount of salt from every product reduces  
42  
43 salt intake in the whole population starting at one year of age when processed food products with  
44  
45 added salt are introduced. With the need to address social inequalities in health, both in the UK  
46  
47 and worldwide, this programme sees those consuming the largest quantities of the saltiest foods  
48  
49 obtaining the greatest benefits. Programs that target the whole food chain such as this also have  
50  
51 a significant cost advantage because additional consumer education and behaviour change is not  
52  
53 required to achieve results. Furthermore, salt reduction, and the costs associated with it, can be  
54  
55  
56  
57  
58  
59  
60

1  
2  
3 absorbed into the continuous reformulation programmes already undertaken by manufacturers  
4 and retailers.  
5  
6  
7

8  
9  
10 Despite the fact that clear reductions in salt content in bread are being made in the UK, there is  
11 still a marked variability in the salt levels of similar bread products as well as differences  
12 between branded and supermarket own brand bread. This demonstrates that while a voluntary  
13 target based approach works to encourage industry reductions, the targets needs to be coupled  
14 with the forceful government or quasi-government agency, e.g. in the UK the Food Standards  
15 Agency and subsequently the Department of Health, to ensure all companies are aware of the  
16 targets and make reductions to achieve the same low levels in salt content so as to have the  
17 maximum benefit on population health. When countries are looking to set their own targets, they  
18 should make sure that a monitoring strategy is included so that all products are reduced across  
19 the board, and to ensure that companies feel that there is a level playing field. This can be greatly  
20 helped by forceful Non-Government Organisations (e.g. in the UK, CASH) that monitor progress  
21 and highlight companies that are not complying.  
22  
23  
24  
25  
26  
27  
28  
29  
30  
31  
32  
33  
34  
35  
36  
37  
38  
39  
40

41 Technological solutions that enable the production of much lower salt products with no loss in  
42 the sensory characteristics of the food may be closely guarded commercial secrets or require  
43 investment in research and materials that only large businesses can afford. Despite there being  
44 advantages to sharing salt reduction information the competition-based business model does not  
45 lend itself to industry-wide dissemination of innovation. A supporting pledge in the  
46 Responsibility Deal indicates that information should be shared between companies, but more  
47 work could be done and the Department of Health needs to encourage this.  
48  
49  
50  
51  
52  
53  
54  
55  
56  
57  
58  
59  
60

1  
2  
3  
4  
5  
6 High salt diets are not a problem unique to the UK.<sup>6</sup> Other countries have started to follow the  
7  
8 UK's lead by setting some of their own salt reduction targets. In Australia and New Zealand, for  
9  
10 instance, bread targets of 400mg sodium/100g (1g salt /100g) and 450mg sodium/100g (1.13g  
11  
12 salt/100g) respectively were introduced in 2010.<sup>39</sup> Monitoring reports from these countries  
13  
14 (2007-2010) reported a 7% reduction in the salt content of bread in New Zealand, but did not  
15  
16 observe a reduction in Australia.<sup>27</sup> However, during the 3 year period, the proportion of products  
17  
18 in each country meeting the target increased from 29% to 50% in Australia and 49% to 90% in  
19  
20 New Zealand, suggesting that reductions are likely to have occurred not only in New Zealand,  
21  
22 but also in Australia, where reductions may have occurred, but not across the board. To highlight  
23  
24 this point, while a reduction of up to 17% was seen in the breads produced by two retailers and  
25  
26 one manufacturer included in the research, an increase of 10% was seen in a fourth company.  
27  
28 This indicates that, while the first step has been taken to reduce salt via a target based approach,  
29  
30 further work in monitoring and engaging all members of the food industry is required to ensure  
31  
32 that salt reduction occurs across the board so as to create a level playing field for all of the  
33  
34 companies involved and also to see the biggest benefits for public health  
35  
36  
37  
38  
39  
40  
41  
42

43  
44 Other countries around the world now need to follow suit and set up a target based approach to  
45  
46 reducing salt content of processed foods. While the food category emphasis may differ between  
47  
48 countries, the concept of using salt targets to achieve a 'level playing field' amongst the industry  
49  
50 is universal. A product like bread is widely consumed internationally and this research  
51  
52 demonstrates how targets can work to lower the levels of salt.  
53  
54  
55  
56  
57  
58  
59  
60

## LIMITATIONS

Our study was based on salt content data provided on bread labels in store, hence we relied on the accuracy of the data provided on the label. However, the study carried out by the Food Standards Agency showed that the analysed figures did match those stated on the labels.<sup>40</sup> It is assumed that the manufacturers provide accurate and up to date information in line with EU Regulations.

In order to provide the most accurate information about the changes in salt levels over time, in particular the reformulation that has occurred, the same products need to be used for analysis. However, due to product name changes it was often hard to ensure that all products available were used as there was no way of determining if a similar named product was a different product or a newly named product. This also means that a limited number of products were used for trend analysis, but our results from both repeated surveys of the same products and the overall analysis of all products have consistently shown a reduction in salt levels in bread products on sale in the UK.

When collecting data we did not capture ingredients list, this means we are unable to ascertain if salt has been replaced with any other ingredients/additives in the bread that came out lowest. Such data should be collected in future surveys.

There is no evidence available to prove that the salt reduction seen in bread has translated into a reduction in salt intake in the UK population. However, given that there is no evidence of a change in the sales of bread in the UK, that the salt content of bread has declined and that the salt

1  
2  
3 intake of the population has declined in parallel, it is likely that the reductions in salt made in  
4 bread have contributed to the measured reductions in population salt intake.  
5  
6  
7  
8  
9

## 10 **CONCLUSION**

11  
12 This research, using the example of bread, demonstrates how a target based approach to salt  
13 reduction can lead to salt reductions being made across the board. There is evidence that  
14 companies could substantially reduce the amount of salt further, based on the variation in salt  
15 levels found.  
16  
17  
18  
19  
20  
21  
22  
23

24 This research presents a clear example of how a salt reduction strategy, based on targets in key  
25 food categories, can ensure that salt levels are reduced without loss of sales and no consumer  
26 reaction. Governments around the world need now to follow the UK's lead and set targets on the  
27 biggest contributors of salt to the diet so as to prevent thousands of deaths every year.  
28  
29  
30  
31  
32  
33  
34  
35  
36  
37  
38

## 39 **Authors contributions**

40  
41  
42 GM conceived the idea and designed research; HB conducted research; HB and FH analyzed  
43 data; HB wrote the first draft of the manuscript and all authors contributed to the interpretation of  
44 the results and revision of the manuscript, and approved the final manuscript. GM had primary  
45 responsibility for final content.  
46  
47  
48  
49  
50  
51  
52  
53

## 54 **Funding**

55  
56 None  
57  
58  
59  
60

## Competing Interests

HB was an employee of Consensus Action on Salt & Health (CASH), a nonprofit charitable organisation at the time of conducting this study. FH is a member of CASH and its international branch World Action on Salt & Health (WASH) and does not receive any financial support from CASH or WASH. GM is Chairman of Blood Pressure Association (BPA), Chairman of CASH and Chairman of WASH. BPA, CASH and WASH are nonprofit charitable organisations. GM does not receive any financial support from any of these organisations. KJ is Campaign Director at CASH, WASH and BPA.

## Data sharing

No additional data available.

## References

1. He FJ, MacGregor GA. Reducing population salt intake worldwide: from evidence to implementation. *Prog Cardiovasc Dis* 2010;52:363-82
2. He FJ, MacGregor GA. Salt reduction lowers cardiovascular risk: meta-analysis of outcome trials. *Lancet* 2011;378:380-2
3. D'Elia L, Rossi G, Ippolito R, et al. Habitual salt intake and risk of gastric cancer: A meta-analysis of prospective studies. *Clin Nutr* 2012;31:489-98
4. He FJ, Marrero NM, MacGregor GA. Salt intake is related to soft drink consumption in children and adolescents: a link to obesity? *Hypertension* 2008;51:629-34
5. Asaria P, Chisholm D, Mathers C, et al. Chronic disease prevention: health effects and financial costs of strategies to reduce salt intake and control tobacco use. *Lancet* 2007;370:2044-53
6. Webster JL, Dunford EK, Hawkes C, Neal BC. Salt reduction initiatives around the world. *J Hypertens* 2011;29:1043-50
7. First global ministerial conference on healthy lifestyles and noncommunicable disease control, 28-29 April 2011, Moscow. [http://www.who.int/nmh/events/moscow\\_ncds\\_2011/en/](http://www.who.int/nmh/events/moscow_ncds_2011/en/) (Access verified 16 May 2011).
8. Beaglehole R, Bonita R, Horton R, et al. Priority actions for the non-communicable disease crisis. *Lancet* 2011;377:1438-47
9. James WP, Ralph A, Sanchez-Castillo CP. The dominance of salt in manufactured food in the sodium intake of affluent societies. *Lancet* 1987;1:426-29
10. Winkler JT. Obesity exposé offers slim pickings. *BMJ* 2012;344:e4465 doi: 10.1136/bmj.e4465



11. Salt reduction targets: March 2006. London, UK: Food Standards Agency, 2006. Available at <http://www.food.gov.uk/multimedia/pdfs/salttargetsapril06.pdf> (Accessed August 17, 2012).
12. Food Standards Agency. Agency publishes 2012 salt reduction targets, 8 May 2009. [www.food.gov.uk/news/newsarchive/2009/may/salttargets](http://www.food.gov.uk/news/newsarchive/2009/may/salttargets) (Access verified May 28, 2010).
13. Department of Health Responsibility Deal, 27 July 2012, <http://responsibilitydeal.dh.gov.uk/2012/07/27/good-progress-on-salt-reduction/> (Accessed 27 July 2012).
14. Wyness LA, Buttriss JL, Stanner SA. Reducing the population's sodium intake: the UK Food Standards Agency's salt reduction programme. *Public Health Nutr* 2012;15:254-61
15. Sutherland J, Edwards P, Shankar B, et al. Fewer adults add salt at the table after initiation of a national salt campaign in the UK: a repeated cross-sectional analysis. *Br J Nutr* 2013;1-7 doi: 10.1017/S0007114512005430published Online First: Epub Date]].
16. Department of Health: Assessment of Dietary Sodium Levels Among Adults (aged 19-64) in England, 2011. <http://transparency.dh.gov.uk/2012/06/21/sodium-levels-among-adults/> (Accessed 25 June 2012).
17. Henderson L, Irving K, Gregory J, et al. National Diet & Nutrition Survey: Adults aged 19 to 64. 2003;3:127-36. London: TSO
18. National Institute for Health and Clinical Excellence (NICE). Guidance on the prevention of cardiovascular disease at the population level. <http://guidance.nice.org.uk/PH25> (Access verified 14 July 2010).
19. Ofcom, Office of Communications. Impact assessment. [http://stakeholders.ofcom.org.uk/binaries/consultations/foodads\\_new/ia.pdf](http://stakeholders.ofcom.org.uk/binaries/consultations/foodads_new/ia.pdf) (Access verified 13 July 2010).
20. Oconnor A. An overview of the role of bread in the UK diet. *Nutrition Bulletin* 2012;37:193–212
21. Quilez J, Salas-Salvado J. Salt in bread in Europe: potential benefits of reduction. *Nutr Rev* 2012;70:666-78 doi: 10.1111/j.1753-4887.2012.00540.xpublished Online First: Epub Date]].
22. National Diet and Nutrition Survey: Headline results from Years 1 and 2 (combined) of the rolling programme 2008/9 - 2009/10. [http://www.dh.gov.uk/en/Publicationsandstatistics/Publications/PublicationsStatistics/DH\\_128166](http://www.dh.gov.uk/en/Publicationsandstatistics/Publications/PublicationsStatistics/DH_128166) (Accessed 16th August 2012).
23. CDC. Centers for Disease Control and Prevention: Vital Signs: Food Categories Contributing the Most to Sodium Consumption — United States, 2007–2008. *Morbidity and Mortality Weekly Report (MMWR)* 2012 61 92-98
24. Woodward E, Eyles H, Ni Mhurchu C. Key opportunities for sodium reduction in New Zealand processed foods. *Aust N Z J Public Health* 2012;36:84-9 doi: 10.1111/j.1753-6405.2012.00829.xpublished Online First: Epub Date]].

- 1
  - 2
  - 3
  - 4
  - 5
  - 6
  - 7
  - 8
  - 9
  - 10
  - 11
  - 12
  - 13
  - 14
  - 15
  - 16
  - 17
  - 18
  - 19
  - 20
  - 21
  - 22
  - 23
  - 24
  - 25
  - 26
  - 27
  - 28
  - 29
  - 30
  - 31
  - 32
  - 33
  - 34
  - 35
  - 36
  - 37
  - 38
  - 39
  - 40
  - 41
  - 42
  - 43
  - 44
  - 45
  - 46
  - 47
  - 48
  - 49
  - 50
  - 51
  - 52
  - 53
  - 54
  - 55
  - 56
  - 57
  - 58
  - 59
  - 60
25. Ministry of Health and the University of Auckland. 2003. Nutrition and the Burden of Disease: New Zealand 1997-2011. Wellington: Ministry of Health. [http://www.moh.govt.nz/notebook/nbbooks.nsf/0/A8D85BC5BAD17610CC256D970072A0AA/\\$file/nutritionandtheburdenofdisease.pdf](http://www.moh.govt.nz/notebook/nbbooks.nsf/0/A8D85BC5BAD17610CC256D970072A0AA/$file/nutritionandtheburdenofdisease.pdf) (Access verified on 29 April 2013).
26. Food Standards Australia New Zealand. Proposal P230. Consideration of mandatory fortification with iodine. Canberra: FSANZ, 2007.
27. Dunford EK, Eyles H, Mhurchu CN, et al. Changes in the sodium content of bread in Australia and New Zealand between 2007 and 2010: implications for policy. *Med J Aust* 2011;195:346-9
28. Food Standards Agency, Determination of sodium content of bread, 2001 <http://www.food.gov.uk/science/surveillance/fsis2001/19bread1> (Accessed 27th July 2011).
29. Food Standards Agency. Archive - MAFF, <http://tna.europarchive.org/20101209103637/http://archive.food.gov.uk/maff/archive/food/infsheet/2000/no194/194bred.htm> (Access verified April 29, 2013).
30. Consumers advised to use their loaf when choosing bread. <http://www.actiononsalt.org.uk/news/surveys/2011/bread/index.html> (Accessed 17 August 2012).
31. Survey shows significant variations in salt content of bread. <http://www.actiononsalt.org.uk/news/surveys/2007/bread/index.html> (Accessed 17 August 2012).
32. Department of Health. Targets <https://www.wp.dh.gov.uk/responsibilitydeal/files/2012/01/Salt-Targets-for-Responsibility-Deal.pdf>.
33. Food and Drink Federation (FDF) and British Retail Consortium (BRC). Evaluation of Technological Approaches to Salt Reduction. 2012. [https://www.fdf.org.uk/resources/salt\\_reduction\\_2012.pdf](https://www.fdf.org.uk/resources/salt_reduction_2012.pdf) (Access verified on 29 April 2013).
34. Food Standards Agency. Consumer Attitudes to Food Standards, 2007. <http://www.food.gov.uk/multimedia/pdfs/cas07en.pdf> (Access verified on 29 April 2013).
35. Girgis S, Neal B, Prescott J, et al. A one-quarter reduction in the salt content of bread can be made without detection. *Eur J Clin Nutr* 2003;57:616-20
36. Liem DG, Miremadi F, Keast RS. Reducing sodium in foods: the effect on flavor. *Nutrients* 2011;3:694-711
37. Tuorila Ollikainen H, Salovaara H, Kurkela R. Effect of saltiness on the liking and consumption of bread and butter. *Ecol Food Nutr* 1986;18:99-106
38. Mintel. Low/No/Reduced Sodium NPD claims decline despite salt concerns. <http://www.mintel.com/press-centre/press-releases/920/lownoreduced-sodium-npd-claims-decline-despite-salt-concerns> (Access verified on 29 April 2013).

- 1  
2  
3  
4  
5  
6  
7  
8  
9  
10  
11  
12  
13  
14  
15  
16  
17  
18  
19  
20  
21  
22  
23  
24  
25  
26  
27  
28  
29  
30  
31  
32  
33  
34  
35  
36  
37  
38  
39  
40  
41  
42  
43  
44  
45  
46  
47  
48  
49  
50  
51  
52  
53  
54  
55  
56  
57  
58  
59  
60
39. Australian Government, Department of Health and Ageing. Summary of Food Categories Engaged under the Food and Health Dialogue to date. [http://www.foodhealthdialogue.gov.au/internet/foodandhealth/publishing.nsf/Content/summary\\_food\\_categories](http://www.foodhealthdialogue.gov.au/internet/foodandhealth/publishing.nsf/Content/summary_food_categories) (Access verified on 29 April 2013).
  40. Food Standards Agency. Determination of sodium content of bread, 2001. <http://www.food.gov.uk/science/research/surveillance/fsis2001/19bread1#.UTR-3le80ct> (Accessed on 4 March 2013).

**Legend for figure 1:** Salt content in bread in repeated surveys, 2001-2011

Table 1. Average salt levels in breads for each year (g salt/100g)

|                    | 2001 |                          | 2006 |                          | 2011 |                            | Change from 2001 to 2011 |     |
|--------------------|------|--------------------------|------|--------------------------|------|----------------------------|--------------------------|-----|
|                    | N    | Mean±SD (range)          | N    | Mean±SD (range)          | N    | Mean±SD (range)            | Mean                     | %   |
| <b>Overall</b>     | 39   | 1.23±0.19<br>(1.00-1.75) | 138  | 1.05±0.16<br>(0.55-1.50) | 203  | 0.98± 0.13<br>(0.58-2.03)  | 0.25                     | 20% |
| <b>Branded</b>     | 18   | 1.27±0.18<br>(1.00-1.50) | 51   | 1.12±0.13<br>(0.55-1.25) | 78   | 1.04 ±0.15<br>(0.75-2.03)  | 0.23                     | 18% |
| <b>Supermarket</b> | 21   | 1.19±0.19<br>(1.00-1.75) | 87   | 1.02±0.16<br>(0.60-1.50) | 125  | 0.95 ± 0.10<br>(0.58-1.20) | 0.24                     | 20% |
| <b>White</b>       | 22   | 1.22±0.18<br>(1.00-1.50) | 46   | 1.09±0.15<br>(0.70-1.50) | 75   | 1.00±0.10<br>(0.58-1.20)   | 0.22                     | 18% |
| <b>Brown</b>       | 7    | 1.16±0.15<br>(1.00-1.35) | 55   | 1.02±0.18<br>(0.55-1.50) | 71   | 0.98±0.18<br>(0.65-2.03)   | 0.18                     | 16% |
| <b>Wholemeal</b>   | 10   | 1.30±0.23<br>(1.00-1.75) | 37   | 1.06±0.11<br>(0.90-1.30) | 57   | 0.97±0.09<br>(0.74-1.18)   | 0.33                     | 25% |

Table 2. Products meeting the 2012 target of  $\leq 1$  g salt/100g in each year

|                    | 2001 |                      | 2006 |                      | 2011 |                      | P value by $\chi^2$ test |
|--------------------|------|----------------------|------|----------------------|------|----------------------|--------------------------|
|                    | N    | N (%) meeting target | N    | N (%) meeting target | N    | N (%) meeting target |                          |
| <b>Overall</b>     | 39   | 12 (30%)             | 138  | 72 (52%)             | 203  | 144 (71%)            | p<0.001                  |
| <b>Branded</b>     | 18   | 4 (21%)              | 51   | 10 (20%)             | 78   | 33 (42%)             | P<0.01                   |
| <b>Supermarket</b> | 21   | 8 (38%)              | 87   | 62 (71%)             | 125  | 111 (89%)            | P<0.01                   |
| <b>White</b>       | 22   | 6 (27%)              | 46   | 22 (48%)             | 75   | 50 (67%)             | P<0.01                   |
| <b>Brown</b>       | 7    | 3 (43%)              | 55   | 31 (56%)             | 71   | 50 (70%)             | P<0.01                   |
| <b>Wholemeal</b>   | 10   | 2 (20%)              | 37   | 19 (51%)             | 57   | 44 (77%)             | P<0.01                   |

## Surveys of the salt content in UK bread

### – Progress made and further reductions possible

Hannah C Brinsden, Feng J He, Katharine H Jenner, Graham A MacGregor

Wolfson Institute of Preventive Medicine, Barts and The London School of Medicine & Dentistry, Queen Mary University of London, UK

**Running title:** Salt reduction in UK bread

Correspondence to:

Dr. Feng He

Wolfson Institute of Preventive Medicine,  
Barts and The London School of Medicine & Dentistry,  
Queen Mary University of London,  
Charterhouse Square,  
London EC1M 6BQ.

Tel: 44 (0)20 7882 6266

Fax: 44 (0)20 7882 6270

E-mail: f.he@qmul.ac.uk

## ABSTRACT

Objectives: To explore the salt reductions made over time in packaged bread sold in the UK, the biggest contributor of salt to the UK diet.

Study design: Cross-sectional surveys were carried out on the salt content of breads available in UK supermarkets in 2001(40 products), 2006 (138) and 2011 (203).

Main outcome measures: The primary outcome measure was the change in salt content per 100g over time. Further measures included proportion of products meeting salt targets and differences between brands and bread types.

Results: The average salt level of bread was  $1.23\pm 0.19\text{g}/100\text{g}$  in 2001,  $1.05\pm 0.16$  in 2006, and  $0.98\pm 0.13$  in 2011. This shows a reduction in salt/100g of  $\approx 20\%$  between 2001 and 2011. In the 18 products which were surveyed in all three years, there was a significant reduction of 17% ( $p<0.05$ ). Supermarket own-brand bread was found to be lower in salt compared to branded bread ( $0.95\text{g}/100\text{g}$  compared to  $1.04\text{g}/100\text{g}$  in 2011). The number of products meeting the 2012 targets increased from 31% in 2001 to 71% in 2011 ( $P<0.001$ ).

Conclusions: This study shows that the salt content of bread has been progressively reduced over time, contributing to the evidence base that a target based approach to salt reduction can lead to reductions being made. A wide variation in salt levels was found with many products already meeting the 2012 targets indicating that further reductions can be made. This requires further progressive lower targets to be set, so that the UK can continue to lead the world in salt reduction and save the maximum number of lives.

**Key words:** bread, reformulation, public health, food industry, salt, sodium

## ARTICLE SUMMARY

### Article focus:

- Populations around the world are consuming too much salt, largely as a result of the high salt content of processed foods.
- The UK is leading the world in salt reduction through the implementation of progressively lower voluntary salt targets across >80 categories of foods.
- Bread is the largest contributor of salt to the UK diet – this research uses a series of cross-sectional surveys of the salt content in UK packaged bread to examine the reductions made over time and the progress made towards meeting the 1g/100g target.

### Key messages:

- The salt content of bread sold in the UK has been progressively reduced over the last decade.
- The results demonstrate that a target based approach to salt reduction can work to reduce the salt content of popular food.
- Other countries around the world need to follow the UK's lead and set salt targets.

### Strengths and limitations of this study:

- This study tracks the salt reductions made in bread over time. It is the first UK study of this kind, adding to research using the same methodology carried out in Australia and New Zealand. The results indicate that progressive lower salt targets can work to reduce salt levels of processed foods and can serve as evidence to encourage other countries around the world to follow this approach to salt reduction.



- The data used was based on manufacturers labels; due to product name changes, trend analysis was only possible for a limited number of products; No ingredient information was collected, so changes in formulations could not be examined.

## FUNDING STATEMENT

This research received no specific grant from any funding agency in the public, commercial or not-for-profit sectors

## COMPETING INTERESTS

HB was an employee of Consensus Action on Salt & Health (CASH), a nonprofit charitable organisation at the time of conducting this study. FH is a member of CASH and its international branch World Action on Salt & Health (WASH) and does not receive any financial support from CASH or WASH. GM is Chairman of Blood Pressure Association (BPA), Chairman of CASH and Chairman of WASH. BPA, CASH and WASH are nonprofit charitable organisations. GM does not receive any financial support from any of these organisations. KJ is Campaign Director at CASH, WASH and BPA.

## INTRODUCTION

There is strong evidence that a high salt intake increases blood pressure and thereby increases the risk of cardiovascular disease (i.e. strokes, heart attacks and heart failure) and kidney disease.<sup>1 2</sup>

A high salt intake also has other harmful effects on health, e.g. increasing the risk of stomach cancer<sup>3</sup> and indirectly linked to obesity.<sup>4</sup> Furthermore, it has been demonstrated that a reduction in population salt intake is one of the most cost-effective measures to improve public health.<sup>5</sup>

1  
2  
3 Populations around the world are consuming salt in quantities that far exceed physiological  
4 requirements.<sup>6</sup> As such, The World Health Organisation (WHO) has recommended salt reduction  
5 as one of the top three priority actions to tackle the non-communicable disease crisis.<sup>7 8</sup>  
6  
7  
8  
9

10  
11  
12 Approximately 75% of the salt consumed in the UK and other developed countries comes from  
13 processed foods, and is added by food manufacturers prior to consumer purchase.<sup>9</sup> A wide range  
14 of food products contain salt, including everyday foods such as bread, breakfast cereals, sauces  
15 and processed meat.  
16  
17  
18  
19  
20  
21

22  
23  
24 The UK has successfully developed a voluntary salt reduction programme which is considered  
25 one of “the most successful nutrition policies in the UK since the second world war”.<sup>10</sup> First  
26 developed by Consensus Action on Salt & Health (CASH), the strategy involves lowering salt  
27 intakes by a) reducing the salt levels of processed foods by a gradual reduction in the amount of  
28 salt added to the processed foods by 40% and b) reducing salt in cooking **or** at the table by 40%.  
29  
30  
31 In order to reduce salt intake from the 9.5 g/d to the projected target of 6.0 g/d in adults, the Food  
32 Standards Agency (FSA) then set a series of progressively lower salt targets for over 80  
33 categories of food,<sup>11 12</sup> which have now been incorporated as part of the Government’s Public  
34 Health Responsibility Salt Pledge.<sup>13</sup> Other countries around the world, including Australia,  
35 **United States** and Canada, are following the UK’s lead and are adopting a similar target based  
36 approach to salt reduction.<sup>6</sup>  
37  
38  
39  
40  
41  
42  
43  
44  
45  
46  
47  
48  
49  
50

51  
52  
53 To date, significant progress has been made by many food manufacturers and retailers in the UK,  
54 with salt content being reduced across the board, including by up to 50% in breakfast cereals,  
55  
56  
57  
58  
59  
60

1  
2  
3 45% in biscuits, 40% in pastry products and 25% in cakes and pasta sauces.<sup>14</sup> Furthermore, it has  
4  
5 been reported that less salt is being added at the table by consumers.<sup>15</sup> The average salt intake in  
6  
7 the UK population is steadily decreasing in parallel, with intakes currently estimated at 8.1g/d,<sup>16</sup>  
8  
9 the lowest known accurate figure of any developed country (i.e. measured by 24h urinary sodium  
10  
11 excretion).<sup>6</sup> This represents a 15% reduction from 2001 (9.5g).<sup>17</sup> This reduction is estimated to  
12  
13 be saving ≈9000 lives every year and resulting in major cost-savings to the UK economy of more  
14  
15 than £1.5 billion per year.<sup>18 19</sup>

20  
21  
22 Bread is of particular interest to policymakers wishing to introduce a salt reduction strategy. On  
23  
24 the one hand bread is an important component of the diets around the world.<sup>20 21</sup> In the UK for  
25  
26 instance, National Diet and Nutrition Surveys (NDNS) shows that bread contributes more than  
27  
28 10% of daily intake of protein, thiamine, niacin, folate, iron, zinc, copper and magnesium; one-  
29  
30 fifth of fibre and calcium intakes; and more than one-quarter of manganese intake.<sup>22</sup> However,  
31  
32 the NDNS also indicates that bread is the single largest contributor of salt to the UK diet,  
33  
34 providing almost a fifth (18%) of salt intake from processed foods (i.e. 18% of 75% total intake).  
35  
36 This equates to approximately 1.07g salt per person per day from bread alone. Bread is also the  
37  
38 leading contributor in other countries such as **United States** (7.4%),<sup>23</sup> New Zealand (26%)<sup>24 25</sup>  
39  
40 and Australia (≈20%).<sup>26 27</sup> Reductions in the salt content of bread would therefore have a  
41  
42 significant impact on salt intake and as such has always been a leading focus of the UK's salt  
43  
44 reduction strategy.  
45  
46  
47  
48  
49  
50  
51  
52  
53  
54  
55  
56  
57  
58  
59  
60

1  
2  
3 Despite the important role that bread plays in the UK diet, not only as a source of nutrients but as  
4  
5 the leading contributor of salt, very little work has been conducted looking at the changes in the  
6  
7 salt content of bread in the UK.  
8  
9

10  
11  
12 In Australia, where authorities are replicating the UK's salt reduction strategy, a paper published  
13  
14 in 2011 explored the changes to sodium content in Australian and New Zealand bread between  
15  
16 2007 and 2010. The paper reported reductions, although only small, to the salt content of bread  
17  
18 in these countries.<sup>27</sup> Other studies that focus on salt in bread, have tended to focus on practical  
19  
20 issues related to salt reduction, including technical feasibility and the potential for use of salt  
21  
22 replacers.. For instance, one study focused on how sodium may be reduced by increasing  
23  
24 potassium levels.<sup>21</sup>  
25  
26  
27  
28  
29  
30  
31

32 Given the importance of bread as a contributor of salt to the UK diet, coupled with perceived  
33  
34 success of the UK's salt reduction campaign, the objective of this paper is to describe the  
35  
36 progress made in reducing the amount of salt added to bread in the UK and discuss the successes  
37  
38 and challenges that lie ahead in the UK in terms of further salt reductions so as to provide  
39  
40 recommendations for both the UK and International Governments on salt reduction programmes.  
41  
42  
43  
44

## 45 **METHODS**

### 46 **Data Collection**

47  
48 Three surveys were carried out, with the first one in 2001, the second one in 2006 and the last  
49  
50 one in 2011. The survey in 2001 was carried out by the FSA<sup>28 29</sup> and the last two surveys by  
51  
52 CASH.<sup>30 31</sup> For all surveys, the data was collected from product packaging and nutrient  
53  
54  
55  
56  
57  
58  
59  
60

1  
2  
3 information panels. The 2011 survey was designed as a comprehensive survey of all breads  
4 available in a snapshot in time, using one large store per retailer in the UK. The 2006 survey was  
5 also designed as a comprehensive survey, but excluded ‘repetition’ products e.g. where there  
6 were two similar products, for instance two crusty white products, by the same company, or  
7 where the same product was available in different sizes. The FSA survey carried out in 2001 was  
8 not designed as a comprehensive survey, instead including a single example of a premium and  
9 standard white, brown and wholemeal loaf from each of the leading supermarkets and brands.  
10 Whilst not comprehensive, the selection of generic products from a number of companies is  
11 likely to ensure that the data collected is reflective of the situation at that point in time. For each  
12 loaf, the data collected included the company name, product name, pack weight, serving size,  
13 sodium/salt per 100 grams and sodium/salt per portion. When there were missing figures, they  
14 were calculated where possible, e.g. the missing sodium or salt values were converted by  
15 multiplying by 2.5 (sodium to salt) or dividing by 2.5 (salt to sodium). All data was double  
16 checked after entry, and a further 5% of entries were checked against the original source in a  
17 random selection of products.  
18  
19  
20  
21  
22  
23  
24  
25  
26  
27  
28  
29  
30  
31  
32  
33  
34  
35  
36  
37  
38  
39  
40

41 *Inclusion/exclusion criteria:* Data were collected from each of the major UK supermarkets (Asda,  
42 Sainsburys, Tesco, Waitrose, Morrisons, The Co-operative and Marks and Spencer) to represent  
43 salt levels of bread in the UK. Packaged sliced loaves of bread were included, including white,  
44 wholemeal, seeded, granary, half and half, and brown. Thick and medium sliced breads were  
45 included. When two sizes were available, the standard 800g loaves were used. Data were  
46 collected for supermarket own brand bread and for branded bread products available. ‘Special’  
47 breads such as rye and soda bread, ethnic breads and fresh breads were excluded  
48  
49  
50  
51  
52  
53  
54  
55  
56  
57  
58  
59  
60

1  
2  
3  
4  
5  
6 *Product categories:* Products were categorised into one of the following 3 groups: White (all  
7 white standard loaves), Wholemeal (all wholemeal loaves, including wholemeal seeded/granary),  
8 Brown (brown, white granary/seeded, 50:50 and wheatgerm). This was based on the criteria used  
9 for the NDNS data collection.<sup>22</sup> ‘Other’ breads were excluded as data for these breads was not  
10 collected in earlier surveys. Data was also categorised separately into branded or supermarket  
11 own brand.  
12  
13  
14  
15  
16  
17  
18  
19  
20  
21

## 22 **Statistics**

23  
24  
25  
26  
27 *Comparison among products within each year:* Unpaired T-test was used to compare the levels  
28 of salt between supermarket own brand and branded products within each year. One Way  
29 ANOVA with Bonferroni post hoc adjustment was used to compare the salt levels of different  
30 bread types (brown, white and wholemeal).  
31  
32  
33  
34  
35  
36  
37  
38

39 *Comparison of the same products over the years:* Repeated Measure ANOVA was used to test  
40 whether there was a significant change in salt content of bread over the years. For the purpose of  
41 this comparison, only the products with data available in all 3 surveys were included in analysis.  
42  
43  
44  
45  
46 In 2 places where a product was available in 2001 and 2011 but not 2006, the 2006 figure was  
47 assumed to be the same as 2001.  
48  
49  
50  
51  
52

53 Data are reported as mean, SD, SE as indicated. Significance in all tests carried out was deemed  
54 as being  $p < 0.05$ . All data was analysed using SPSS software.  
55  
56  
57  
58  
59  
60

1  
2  
3  
4  
5  
6  
7  
8  
9  
10  
11  
12  
13  
14  
15  
16  
17  
18  
19  
20  
21  
22  
23  
24  
25  
26  
27  
28  
29  
30  
31  
32  
33  
34  
35  
36  
37  
38  
39  
40  
41  
42  
43  
44  
45  
46  
47  
48  
49  
50  
51  
52  
53  
54  
55  
56  
57  
58  
59  
60

*Salt targets:* For each year and category, we calculated the total number and percentage of products that met the Department of Health's 2012 salt target for bread (i.e.  $\leq 1\text{g}/100\text{g}$ ).<sup>32</sup>

## RESULTS

### Within year analysis

Table 1 shows the levels of salt in bread for all 3 surveys.

#### 2001

A total of 40 bread products met the inclusion criteria. One outlier was excluded from analysis as the salt level was much lower than all comparable products, and also much lower than those made by the same company. In the remaining 39 bread products, the average salt level per 100g was  $1.23\pm 0.19\text{g}$  with a range of 1.00g to 1.75g.

Table 1 shows the mean salt level for branded and supermarket, as well as salt level by bread type (white, brown and wholemeal). The salt level was slightly higher in branded compared with supermarket own brand, but this difference was not statistically significant ( $p=0.189$ ). There was no significant difference in the salt content per 100g of different bread types ( $p=0.291$ ).

#### 2006

The average salt level per 100g was  $1.05\pm 0.16\text{g}$  with a range of 0.55g to 1.50g. Of the 138 products, 51 were branded products and 87 were supermarket own brand. The salt level in branded products was significantly higher compared with that in supermarket own brand

1  
2  
3 (p<0.01) (Table 1). No significant difference was found between the salt content per 100g of  
4  
5 different bread types (p=0.104) (Table 1).  
6  
7  
8  
9

10  
11 *2011*

12 The average salt level per 100g was 0.98±0.13g with a range of 0.58g to 2.03g. Of the 203  
13 products, 78 were branded products and 125 were supermarket own brand. The salt level in  
14 branded products was significantly higher compared with that in supermarket own brand  
15 (p<0.01) (Table 1). No significant difference was found between the salt content per 100g of  
16 different bread types (p=0.410) (Table 1).  
17  
18  
19  
20  
21  
22  
23  
24  
25  
26

### 27 **Changes in salt levels in bread over the years**

28  
29 Taking all products together, there was a gradual reduction in the salt content of bread. On  
30 average, salt level was reduced by 20% from 2001 to 2011.  
31  
32  
33  
34  
35

36 There were 18 products from 9 different companies that had salt levels surveyed in all three  
37 years. Ten of the bread products were white, and 8 were wholemeal. Eight of the products were  
38 branded and 10 were from retailers. The average salt levels per 100g for these 18 products were  
39 1.24±0.16g in 2001, 1.14±0.25g in 2006 and 1.03±0.25g in 2011 (p<0.05 by repeated measures  
40 ANOVA). This represents a reduction of 17% from 2001 to 2011. Note that these averages are  
41 slightly different from those when all products were included in each year and this trend analysis  
42 merely reflects reductions made in the same products rather than overall products available.  
43  
44  
45  
46  
47  
48  
49  
50  
51  
52  
53  
54

### 55 **Comparing with the 2012 targets**



1  
2  
3 The 2012 bread target, as part of the Department of Health's Responsibility Deal, is  $\leq$  1g  
4 salt/100g. Our results showed that, from 2001 to 2011, there was a significant increase in the  
5  
6 number of products meeting the 2012 targets (Table 2). In 2001, 30% of products (12/40) met  
7  
8 this target, increasing to 52% in 2006 (72/138) and 71% in 2011 (144/203). A greater number of  
9  
10 supermarket own brand products compared to branded products met this target in all years: 38%  
11  
12 compared to 21% in 2001; 71% compared to 20% in 2006; 89% compared to 42% in 2011.  
13  
14  
15  
16  
17  
18  
19

## 20 DISCUSSION

21  
22 The UK is currently leading the world with salt reduction using a strategy, developed in 2003 by  
23  
24 the UK Food Standards Agency and CASH, based on a set of voluntary targets which promote  
25  
26 the gradual reduction in the amount of salt added to processed foods, in particular those foods  
27  
28 that contribute most salt to the UK diet. Our paper, using the example of the biggest contributor  
29  
30 of salt to the UK diet – bread, demonstrates that a national target based approach to  
31  
32 reformulation can be a successful method for reducing the salt content in processed foods.  
33  
34  
35  
36  
37  
38

### 39 Significant reductions have been achieved

40  
41 Our repeated surveys of the same bread products over time demonstrates that significant  
42  
43 reductions have been made in the salt content of bread and that there has been a significant  
44  
45 increase in the number of products that meet the salt targets over the last 10years. Further  
46  
47 analysis of all the breads surveyed in each year shows that the bread on sale in 2011 contains, on  
48  
49 average, 20% less salt than the breads surveyed in 2001. The reductions that have been made  
50  
51 since 2001 have gone unnoticed by the general public, with no impact on sales or consumer  
52  
53 behaviour.<sup>33</sup> Interestingly, no significant difference in the salt content of white, wholemeal and  
54  
55  
56  
57  
58  
59  
60

1  
2  
3 brown bread was found, despite the common perception that wholemeal and brown bread are  
4 healthier alternatives to white bread.<sup>34</sup>  
5  
6  
7  
8  
9

10 Branded products were found to contain approximately 10% more salt compared to supermarket  
11 breads in 2011 (1.04g vs. 0.95g,  $p < 0.01$ ). Although brands have made similar reductions  
12 compared to supermarkets over the last 10 years (0.23g/100g compared to 0.24g/100g), the  
13 branded products started with a higher level of salt, and brands now need to ensure they make  
14 further reductions to come in line with the lower levels seen in supermarket own brand breads.  
15  
16  
17  
18  
19  
20  
21  
22  
23

24 The fact that supermarket own brand breads have been produced with lower levels of salt  
25 demonstrates that delivering salt reduction appears not to be a technical issue related to bread  
26 manufacture. Corporate decisions about food composition are often based upon factors such as  
27 taste and price, rather than health. However, evidence suggests that where salt reductions are  
28 made gradually in bread over time, no reduction in consumer preference is reported.<sup>35 36</sup> Indeed,  
29 a number of studies have shown that gradual reductions can go unnoticed by the consumer. For  
30 instance, a controlled study by Girgis et al<sup>35</sup> found that gradual reductions of up to a quarter in  
31 the salt content of bread over a 6 week period went largely unnoticed and that further reductions  
32 of up to 67% were possible when the bread was served with a sweet or savoury filling. Another  
33 study by Tuorila-Ollikainen et al<sup>37</sup> investigated the effect of salt reduction on bread consumption  
34 over 12 weeks at a lunch restaurant. Regular salted wheat bread was available at the start and end  
35 of the experiment (3-wk periods both) and 31% salt-reduced bread was offered in the 6 wk  
36 between. This study showed unchanged bread consumption when the salt-reduced bread was  
37 offered.  
38  
39  
40  
41  
42  
43  
44  
45  
46  
47  
48  
49  
50  
51  
52  
53  
54  
55  
56  
57  
58  
59  
60

1  
2  
3  
4  
5  
6 Products specifically promoted as ‘low/no/reduced salt’ are sometimes perceived as having a  
7  
8 different taste.<sup>38</sup> This emphasises the need for widespread industry gradual reductions to reduce  
9  
10 population salt intake, rather than relying on consumers opting for lower salt versions. To ensure  
11  
12 continued consumer acceptance of lower salt foods it is important that all manufacturers,  
13  
14 particularly branded bread manufacturers in the UK, continue to reduce the salt content of their  
15  
16 bread, in line with the levels found in supermarket breads, so as to ensure the greatest benefit for  
17  
18 public health.  
19  
20  
21  
22  
23

### 24 **Implications for global public health and learnings from the UK**

25  
26 **Our** findings support previous studies that have indicated a reduction in salt in popular household  
27  
28 products, such as a reduction of up to 50% in breakfast cereals, 45% in biscuits, 40% in pastry  
29  
30 products and 25% in cakes and pasta sauces.<sup>14</sup>  
31  
32  
33  
34  
35

36  
37 **A** programme, based on a series of gradual reductions across the sector over a period of years,  
38  
39 can lead to a large cumulative reduction in salt content of foods and therefore in population salt  
40  
41 intakes. Additionally, a program that removes a small amount of salt from every product reduces  
42  
43 salt intake in the whole population starting at one year of age when processed food products with  
44  
45 added salt are introduced. With the need to address social inequalities in health, both in the UK  
46  
47 and worldwide, this programme sees those consuming the largest quantities of the saltiest foods  
48  
49 obtaining the greatest benefits. Programs that target the whole food chain such as this also have  
50  
51 a significant cost advantage because additional consumer education and behaviour change is not  
52  
53 required to achieve results. Furthermore, salt reduction, and the costs associated with it, can be  
54  
55  
56  
57  
58  
59  
60

1  
2  
3 absorbed into the continuous reformulation programmes already undertaken by manufacturers  
4  
5 and retailers.  
6  
7

8  
9  
10 Despite the fact that clear reductions in salt content in bread are being made in the UK, there is  
11  
12 still a marked variability in the salt levels of similar bread products as well as differences  
13  
14 between branded and supermarket own brand bread. This demonstrates that while a voluntary  
15  
16 target based approach works to encourage industry reductions, the targets needs to be coupled  
17  
18 with the forceful government or quasi-government agency, e.g. in the UK the Food Standards  
19  
20 Agency and subsequently the Department of Health, to ensure all companies are aware of the  
21  
22 targets and make reductions to achieve the same low levels in salt content so as to have the  
23  
24 maximum benefit on population health. When countries are looking to set their own targets, they  
25  
26 should make sure that a monitoring strategy is included so that all products are reduced across  
27  
28 the board, and to ensure that companies feel that there is a level playing field. This can be greatly  
29  
30 helped by forceful Non-Government Organisations (e.g. in the UK, CASH) that monitor progress  
31  
32 and highlight companies that are not complying.  
33  
34  
35  
36  
37  
38  
39

40  
41 Technological solutions that enable the production of much lower salt products with no loss in  
42  
43 the sensory characteristics of the food may be closely guarded commercial secrets or require  
44  
45 investment in research and materials that only large businesses can afford. Despite there being  
46  
47 advantages to sharing salt reduction information the competition-based business model does not  
48  
49 lend itself to industry-wide dissemination of innovation. A supporting pledge in the  
50  
51 Responsibility Deal indicates that information should be shared between companies, but more  
52  
53 work could be done and the Department of Health needs to encourage this.  
54  
55  
56  
57  
58  
59  
60

1  
2  
3  
4  
5  
6 High salt diets are not a problem unique to the UK.<sup>6</sup> Other countries have started to follow the  
7  
8 UK's lead by setting some of their own salt reduction targets. In Australia and New Zealand, for  
9  
10 instance, bread targets of 400mg sodium/100g (1g salt /100g) and 450mg sodium/100g (1.13g  
11  
12 salt/100g) respectively were introduced in 2010.<sup>39</sup> Monitoring reports from these countries  
13  
14 (2007-2010) reported a 7% reduction in the salt content of bread in New Zealand, but did not  
15  
16 observe a reduction in Australia.<sup>27</sup> However, during the 3 year period, the proportion of products  
17  
18 in each country meeting the target increased from 29% to 50% in Australia and 49% to 90% in  
19  
20 New Zealand, suggesting that reductions are likely to have occurred not only in New Zealand,  
21  
22 but also in Australia, where reductions may have occurred, but not across the board. To highlight  
23  
24 this point, while a reduction of up to 17% was seen in the breads produced by two retailers and  
25  
26 one manufacturer included in the research, an increase of 10% was seen in a fourth company.  
27  
28 This indicates that, while the first step has been taken to reduce salt via a target based approach,  
29  
30 further work in monitoring and engaging all members of the food industry is required to ensure  
31  
32 that salt reduction occurs across the board so as to create a level playing field for all of the  
33  
34 companies involved and also to see the biggest benefits for public health  
35  
36  
37  
38  
39  
40  
41  
42

43  
44 Other countries around the world now need to follow suit and set up a target based approach to  
45  
46 reducing salt content of processed foods. While the food category emphasis may differ between  
47  
48 countries, the concept of using salt targets to achieve a 'level playing field' amongst the industry  
49  
50 is universal. A product like bread is widely consumed internationally and this research  
51  
52 demonstrates how targets can work to lower the levels of salt.  
53  
54  
55  
56  
57  
58  
59  
60

## LIMITATIONS

Our study was based on salt content data provided on bread labels in store, hence we relied on the accuracy of the data provided on the label. However, the study carried out by the Food Standards Agency showed that the analysed figures did match those stated on the labels.<sup>40</sup> It is assumed that the manufacturers provide accurate and up to date information in line with EU Regulations.

In order to provide the most accurate information about the changes in salt levels over time, in particular the reformulation that has occurred, the same products need to be used for analysis. However, due to product name changes it was often hard to ensure that all products available were used as there was no way of determining if a similar named product was a different product or a newly named product. This also means that a limited number of products were used for trend analysis, but our results from both repeated surveys of the same products and the overall analysis of all products have consistently shown a reduction in salt levels in bread products on sale in the UK.

When collecting data we did not capture ingredients list, this means we are unable to ascertain if salt has been replaced with any other ingredients/additives in the bread that came out lowest. Such data should be collected in future surveys.

There is no evidence available to prove that the salt reduction seen in bread has translated into a reduction in salt intake in the UK population. However, given that there is no evidence of a change in the sales of bread in the UK, that the salt content of bread has declined and that the salt

1  
2  
3 intake of the population has declined in parallel, it is likely that the reductions in salt made in  
4 bread have contributed to the measured reductions in population salt intake.  
5  
6  
7  
8  
9

## 10 **CONCLUSION**

11  
12 This research, using the example of bread, demonstrates how a target based approach to salt  
13 reduction can lead to salt reductions being made across the board. There is evidence that  
14 companies could substantially reduce the amount of salt further, based on the variation in salt  
15 levels found.  
16  
17  
18  
19  
20  
21  
22  
23

24 This research presents a clear example of how a salt reduction strategy, based on targets in key  
25 food categories, can ensure that salt levels are reduced without loss of sales and no consumer  
26 reaction. Governments around the world need now to follow the UK's lead and set targets on the  
27 biggest contributors of salt to the diet so as to prevent thousands of deaths every year.  
28  
29  
30  
31  
32  
33  
34  
35  
36  
37  
38

## 39 **Authors contributions**

40  
41  
42 GM conceived the idea and designed research; HB conducted research; HB and FH analyzed  
43 data; HB wrote the first draft of the manuscript and all authors contributed to the interpretation of  
44 the results and revision of the manuscript, and approved the final manuscript. GM had primary  
45 responsibility for final content.  
46  
47  
48  
49  
50  
51  
52  
53  
54  
55  
56  
57  
58  
59  
60

## References

1. He FJ, MacGregor GA. Reducing population salt intake worldwide: from evidence to implementation. *Prog Cardiovasc Dis* 2010;52:363-82
2. He FJ, MacGregor GA. Salt reduction lowers cardiovascular risk: meta-analysis of outcome trials. *Lancet* 2011;378:380-2
3. D'Elia L, Rossi G, Ippolito R, Cappuccio FP, Strazzullo P. Habitual salt intake and risk of gastric cancer: A meta-analysis of prospective studies. *Clin Nutr* 2012;31:489-98
4. He FJ, Marrero NM, MacGregor GA. Salt intake is related to soft drink consumption in children and adolescents: a link to obesity? *Hypertension* 2008;51:629-34
5. Asaria P, Chisholm D, Mathers C, Ezzati M, Beaglehole R. Chronic disease prevention: health effects and financial costs of strategies to reduce salt intake and control tobacco use. *Lancet* 2007;370:2044-53
6. Webster JL, Dunford EK, Hawkes C, Neal BC. Salt reduction initiatives around the world. *J Hypertens* 2011;29:1043-50
7. First global ministerial conference on healthy lifestyles and noncommunicable disease control, 28-29 April 2011, Moscow. [http://www.who.int/nmh/events/moscow\\_ncds\\_2011/en/](http://www.who.int/nmh/events/moscow_ncds_2011/en/) (Access verified 16 May 2011).
8. Beaglehole R, Bonita R, Horton R, Adams C, Alleyne G, Asaria P, et al. Priority actions for the non-communicable disease crisis. *Lancet* 2011;377:1438-47
9. James WP, Ralph A, Sanchez-Castillo CP. The dominance of salt in manufactured food in the sodium intake of affluent societies. *Lancet* 1987;1:426-29
10. Winkler JT. Obesity exposé offers slim pickings. *BMJ* 2012;344:e4465 doi: 10.1136/bmj.e4465
11. Salt reduction targets: March 2006. London, UK: Food Standards Agency, 2006. Available at <http://www.food.gov.uk/multimedia/pdfs/saltpapmarch06.pdf> (Accessed August 17, 2012).
12. Food Standards Agency. Agency publishes 2012 salt reduction targets, 8 May 2009. [www.food.gov.uk/news/newsarchive/2009/may/saltpapmarch06.pdf](http://www.food.gov.uk/news/newsarchive/2009/may/saltpapmarch06.pdf) (Access verified May 28, 2010).
13. Department of Health Responsibility Deal, 27 July 2012, <http://responsibilitydeal.dh.gov.uk/2012/07/27/good-progress-on-salt-reduction/> (Accessed 27 July 2012).
14. Wyness LA, Buttriss JL, Stanner SA. Reducing the population's sodium intake: the UK Food Standards Agency's salt reduction programme. *Public Health Nutr* 2012;15:254-61
15. Sutherland J, Edwards P, Shankar B, Dangour AD. Fewer adults add salt at the table after initiation of a national salt campaign in the UK: a repeated cross-sectional analysis. *Br J Nutr* 2013;1-7 doi: 10.1017/S0007114512005430published Online First: Epub Date]].



16. Department of Health: Assessment of Dietary Sodium Levels Among Adults (aged 19-64) in England, 2011. <http://transparency.dh.gov.uk/2012/06/21/sodium-levels-among-adults/> (Accessed 25 June 2012).
17. Henderson L, Irving K, Gregory J, Bates CJ, Prentice A, Perks J, et al. National Diet & Nutrition Survey: Adults aged 19 to 64. 2003;3:127-36. London: TSO
18. National Institute for Health and Clinical Excellence (NICE). Guidance on the prevention of cardiovascular disease at the population level. <http://guidance.nice.org.uk/PH25> (Access verified 14 July 2010).
19. Ofcom, Office of Communications. Impact assessment. [http://stakeholders.ofcom.org.uk/binaries/consultations/foodads\\_new/ia.pdf](http://stakeholders.ofcom.org.uk/binaries/consultations/foodads_new/ia.pdf) (Access verified 13 July 2010).
20. Oconnor A. An overview of the role of bread in the UK diet. *Nutrition Bulletin* 2012;37:193–212
21. Quilez J, Salas-Salvado J. Salt in bread in Europe: potential benefits of reduction. *Nutr Rev* 2012;70:666-78 doi: 10.1111/j.1753-4887.2012.00540.xpublished Online First: Epub Date]].
22. National Diet and Nutrition Survey: Headline results from Years 1 and 2 (combined) of the rolling programme 2008/9 - 2009/10. [http://www.dh.gov.uk/en/Publicationsandstatistics/Publications/PublicationsStatistics/DH\\_128166](http://www.dh.gov.uk/en/Publicationsandstatistics/Publications/PublicationsStatistics/DH_128166) (Accessed 16th August 2012).
23. CDC. Centers for Disease Control and Prevention: Vital Signs: Food Categories Contributing the Most to Sodium Consumption — United States, 2007–2008. *Morbidity and Mortality Weekly Report (MMWR)* 2012 61 92-98
24. Woodward E, Eyles H, Ni Mhurchu C. Key opportunities for sodium reduction in New Zealand processed foods. *Aust N Z J Public Health* 2012;36:84-9 doi: 10.1111/j.1753-6405.2012.00829.xpublished Online First: Epub Date]].
25. Ministry of Health and the University of Auckland. 2003. Nutrition and the Burden of Disease: New Zealand 1997-2011. Wellington: Ministry of Health. [http://www.moh.govt.nz/notebook/nbbooks.nsf/0/A8D85BC5BAD17610CC256D970072A0AA/\\$file/nutritionandtheburdenofdisease.pdf](http://www.moh.govt.nz/notebook/nbbooks.nsf/0/A8D85BC5BAD17610CC256D970072A0AA/$file/nutritionandtheburdenofdisease.pdf) (Access verified on 29 April 2013).
26. Food Standards Australia New Zealand. Proposal P230. Consideration of mandatory fortification with iodine. Canberra: FSANZ, 2007.
27. Dunford EK, Eyles H, Mhurchu CN, Webster JL, Neal BC. Changes in the sodium content of bread in Australia and New Zealand between 2007 and 2010: implications for policy. *Med J Aust* 2011;195:346-9
28. Food Standards Agency, Determination of sodium content of bread, 2001 <http://www.food.gov.uk/science/surveillance/fsis2001/19bread1> (Accessed 27th July 2011).
29. Food Standards Agency. Archive - MAFF, <http://tna.europarchive.org/20101209103637/http://archive.food.gov.uk/maff/archive/food/infsheet/2000/no194/194bred.htm> (Access verified April 29, 2013).

- 1  
2  
3  
4  
5  
6  
7  
8  
9  
10  
11  
12  
13  
14  
15  
16  
17  
18  
19  
20  
21  
22  
23  
24  
25  
26  
27  
28  
29  
30  
31  
32  
33  
34  
35  
36  
37  
38  
39  
40  
41  
42  
43  
44  
45  
46  
47  
48  
49  
50  
51  
52  
53
30. Consumers advised to use their loaf when choosing bread. <http://www.actiononsalt.org.uk/news/surveys/2011/bread/index.html> (Accessed 17 August 2012).
  31. Survey shows significant variations in salt content of bread. <http://www.actiononsalt.org.uk/news/surveys/2007/bread/index.html> (Accessed 17 August 2012).
  32. Department of Health. Targets <https://www.wp.dh.gov.uk/responsibilitydeal/files/2012/01/Salt-Targets-for-Responsibility-Deal.pdf>.
  33. Food and Drink Federation (FDF) and British Retail Consortium (BRC). Evaluation of Technological Approaches to Salt Reduction. 2012. [https://www.fdf.org.uk/resources/salt\\_reduction\\_2012.pdf](https://www.fdf.org.uk/resources/salt_reduction_2012.pdf) (Access verified on 29 April 2013).
  34. Food Standards Agency. Consumer Attitudes to Food Standards, 2007. <http://www.food.gov.uk/multimedia/pdfs/cas07en.pdf> (Access verified on 29 April 2013).
  35. Girgis S, Neal B, Prescott J, Prendergast J, Dumbrell S, Turner C, et al. A one-quarter reduction in the salt content of bread can be made without detection. *Eur J Clin Nutr* 2003;57:616-20
  36. Liem DG, Miremadi F, Keast RS. Reducing sodium in foods: the effect on flavor. *Nutrients* 2011;3:694-711
  37. Tuorila Ollikainen H, Salovaara H, Kurkela R. Effect of saltiness on the liking and consumption of bread and butter. *Ecol Food Nutr* 1986;18:99-106
  38. Mintel. Low/No/Reduced Sodium NPD claims decline despite salt concerns. <http://www.mintel.com/press-centre/press-releases/920/lownoreduced-sodium-npd-claims-decline-despite-salt-concerns> (Access verified on 29 April 2013).
  39. Australian Government, Department of Health and Ageing. Summary of Food Categories Engaged under the Food and Health Dialogue to date. [http://www.foodhealthdialogue.gov.au/internet/foodandhealth/publishing.nsf/Content/summary\\_food\\_categories](http://www.foodhealthdialogue.gov.au/internet/foodandhealth/publishing.nsf/Content/summary_food_categories) (Access verified on 29 April 2013).
  40. Food Standards Agency. Determination of sodium content of bread, 2001. <http://www.food.gov.uk/science/research/surveillance/fsis2001/19bread1#.UTR-3le80ct> (Accessed on 4 March 2013).

54  
55  
56  
57  
58  
59  
60

**Legend for figure 1:** Salt content in bread in repeated surveys, 2001-2011

Table 1. Average salt levels in breads for each year (g salt/100g)

1  
2  
3  
4  
5  
6  
7  
8  
9  
10  
11  
12  
13  
14  
15  
16  
17  
18  
19  
20  
21  
22  
23  
24  
25  
26  
27  
28  
29  
30  
31  
32  
33  
34  
35  
36  
37  
38  
39  
40  
41  
42  
43  
44  
45  
46  
47  
48  
49  
50  
51  
52  
53  
54  
55  
56  
57  
58  
59  
60

|                    | 2001 |                          | 2006 |                          | 2011 |                            | Change from 2001 to 2011 |     |
|--------------------|------|--------------------------|------|--------------------------|------|----------------------------|--------------------------|-----|
|                    | N    | Mean±SD (range)          | N    | Mean±SD (range)          | N    | Mean±SD (range)            | Mean                     | %   |
| <b>Overall</b>     | 39   | 1.23±0.19<br>(1.00-1.75) | 138  | 1.05±0.16<br>(0.55-1.50) | 203  | 0.98± 0.13<br>(0.58-2.03)  | 0.25                     | 20% |
| <b>Branded</b>     | 18   | 1.27±0.18<br>(1.00-1.50) | 51   | 1.12±0.13<br>(0.55-1.25) | 78   | 1.04 ±0.15<br>(0.75-2.03)  | 0.23                     | 18% |
| <b>Supermarket</b> | 21   | 1.19±0.19<br>(1.00-1.75) | 87   | 1.02±0.16<br>(0.60-1.50) | 125  | 0.95 ± 0.10<br>(0.58-1.20) | 0.24                     | 20% |
| <b>White</b>       | 22   | 1.22±0.18<br>(1.00-1.50) | 46   | 1.09±0.15<br>(0.70-1.50) | 75   | 1.00±0.10<br>(0.58-1.20)   | 0.22                     | 18% |
| <b>Brown</b>       | 7    | 1.16±0.15<br>(1.00-1.35) | 55   | 1.02±0.18<br>(0.55-1.50) | 71   | 0.98±0.18<br>(0.65-2.03)   | 0.18                     | 16% |
| <b>Wholemeal</b>   | 10   | 1.30±0.23<br>(1.00-1.75) | 37   | 1.06±0.11<br>(0.90-1.30) | 57   | 0.97±0.09<br>(0.74-1.18)   | 0.33                     | 25% |

Table 2. Products meeting the 2012 target of  $\leq 1$  g salt/100g in each year

|                    | 2001 |                      | 2006 |                      | 2011 |                      | P value by $\chi^2$ test |
|--------------------|------|----------------------|------|----------------------|------|----------------------|--------------------------|
|                    | N    | N (%) meeting target | N    | N (%) meeting target | N    | N (%) meeting target |                          |
| <b>Overall</b>     | 39   | 12 (30%)             | 138  | 72 (52%)             | 203  | 144 (71%)            | p<0.001                  |
| <b>Branded</b>     | 18   | 4 (21%)              | 51   | 10 (20%)             | 78   | 33 (42%)             | P<0.01                   |
| <b>Supermarket</b> | 21   | 8 (38%)              | 87   | 62 (71%)             | 125  | 111 (89%)            | P<0.01                   |
| <b>White</b>       | 22   | 6 (27%)              | 46   | 22 (48%)             | 75   | 50 (67%)             | P<0.01                   |
| <b>Brown</b>       | 7    | 3 (43%)              | 55   | 31 (56%)             | 71   | 50 (70%)             | P<0.01                   |
| <b>Wholemeal</b>   | 10   | 2 (20%)              | 37   | 19 (51%)             | 57   | 44 (77%)             | P<0.01                   |

1  
2  
3  
4  
5  
6  
7  
8  
9  
10  
11  
12  
13  
14  
15  
16  
17  
18  
19  
20  
21  
22  
23  
24  
25  
26  
27  
28  
29  
30  
31  
32  
33  
34  
35  
36  
37  
38  
39  
40  
41  
42  
43  
44  
45  
46  
47  
48  
49  
50  
51  
52  
53  
54  
55  
56  
57  
58  
59  
60

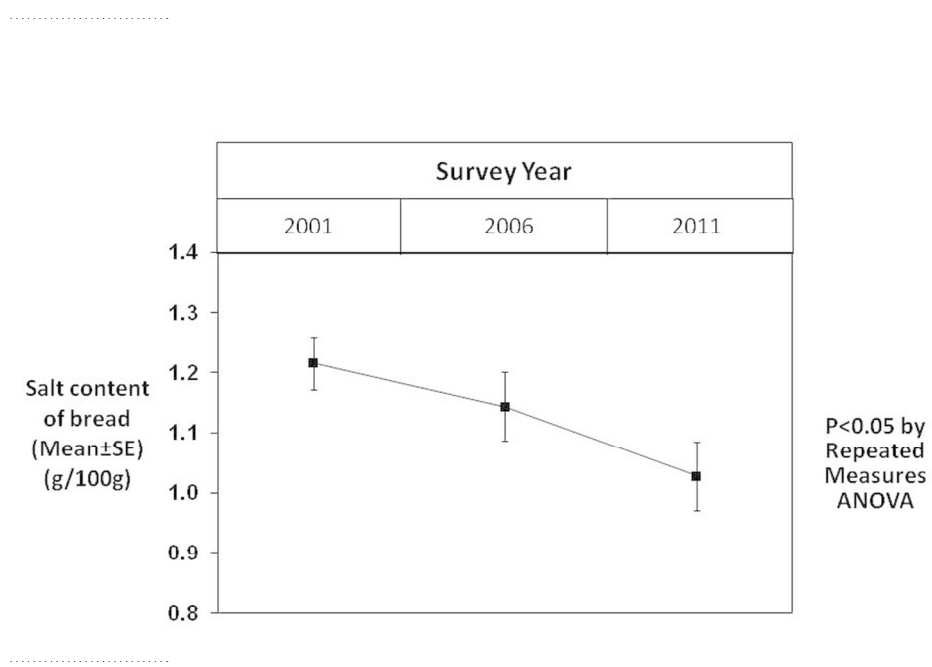

119x90mm (300 x 300 DPI)

Review only

## STROBE Statement—checklist of items that should be included in reports of observational studies

|                           | Item No | Recommendation                                                                                                                                                                                                                                                                                                                                                                                                                                                         | Page Number Reported |
|---------------------------|---------|------------------------------------------------------------------------------------------------------------------------------------------------------------------------------------------------------------------------------------------------------------------------------------------------------------------------------------------------------------------------------------------------------------------------------------------------------------------------|----------------------|
| <b>Title and abstract</b> | 1       | (a) Indicate the study's design with a commonly used term in the title or the abstract                                                                                                                                                                                                                                                                                                                                                                                 | 2                    |
|                           |         | (b) Provide in the abstract an informative and balanced summary of what was done and what was found                                                                                                                                                                                                                                                                                                                                                                    | 2                    |
| <b>Introduction</b>       |         |                                                                                                                                                                                                                                                                                                                                                                                                                                                                        |                      |
| Background/rationale      | 2       | Explain the scientific background and rationale for the investigation being reported                                                                                                                                                                                                                                                                                                                                                                                   | 4-5                  |
| Objectives                | 3       | State specific objectives, including any prespecified hypotheses                                                                                                                                                                                                                                                                                                                                                                                                       | 5                    |
| <b>Methods</b>            |         |                                                                                                                                                                                                                                                                                                                                                                                                                                                                        |                      |
| Study design              | 4       | Present key elements of study design early in the paper                                                                                                                                                                                                                                                                                                                                                                                                                | 5                    |
| Setting                   | 5       | Describe the setting, locations, and relevant dates, including periods of recruitment, exposure, follow-up, and data collection                                                                                                                                                                                                                                                                                                                                        | 5-6                  |
| Participants              | 6       | (a) <i>Cohort study</i> —Give the eligibility criteria, and the sources and methods of selection of participants. Describe methods of follow-up<br><i>Case-control study</i> —Give the eligibility criteria, and the sources and methods of case ascertainment and control selection. Give the rationale for the choice of cases and controls<br><i>Cross-sectional study</i> —Give the eligibility criteria, and the sources and methods of selection of participants | Not applicable       |
|                           |         | (b) <i>Cohort study</i> —For matched studies, give matching criteria and number of exposed and unexposed<br><i>Case-control study</i> —For matched studies, give matching criteria and the number of controls per case                                                                                                                                                                                                                                                 | Not applicable       |
| Variables                 | 7       | Clearly define all outcomes, exposures, predictors, potential confounders, and effect modifiers. Give diagnostic criteria, if applicable                                                                                                                                                                                                                                                                                                                               | 6-7                  |
| Data sources/measurement  | 8*      | For each variable of interest, give sources of data and details of methods of assessment (measurement). Describe comparability of assessment methods if there is more than one group                                                                                                                                                                                                                                                                                   | 5                    |
| Bias                      | 9       | Describe any efforts to address potential sources of bias                                                                                                                                                                                                                                                                                                                                                                                                              | 6                    |
| Study size                | 10      | Explain how the study size was arrived at                                                                                                                                                                                                                                                                                                                                                                                                                              | Not applicable       |
| Quantitative variables    | 11      | Explain how quantitative variables were handled in the analyses. If applicable, describe which groupings were chosen and why                                                                                                                                                                                                                                                                                                                                           | 6                    |
| Statistical methods       | 12      | (a) Describe all statistical methods, including those used to control for confounding                                                                                                                                                                                                                                                                                                                                                                                  | 6-7                  |
|                           |         | (b) Describe any methods used to examine subgroups and interactions                                                                                                                                                                                                                                                                                                                                                                                                    | 6                    |
|                           |         | (c) Explain how missing data were addressed                                                                                                                                                                                                                                                                                                                                                                                                                            | 7                    |
|                           |         | (d) <i>Cohort study</i> —If applicable, explain how loss to follow-up was addressed<br><i>Case-control study</i> —If applicable, explain how matching of cases and controls was addressed<br><i>Cross-sectional study</i> —If applicable, describe analytical methods taking                                                                                                                                                                                           | Not applicable       |

|                          |     |                                                                                                                                                                                                              |                |
|--------------------------|-----|--------------------------------------------------------------------------------------------------------------------------------------------------------------------------------------------------------------|----------------|
|                          |     | account of sampling strategy                                                                                                                                                                                 |                |
|                          |     | (e) Describe any sensitivity analyses                                                                                                                                                                        | 6              |
| <b>Results</b>           |     |                                                                                                                                                                                                              |                |
| Participants             | 13* | (a) Report numbers of individuals at each stage of study—eg numbers potentially eligible, examined for eligibility, confirmed eligible, included in the study, completing follow-up, and analysed            | Not applicable |
|                          |     | (b) Give reasons for non-participation at each stage                                                                                                                                                         | Not applicable |
|                          |     | (c) Consider use of a flow diagram                                                                                                                                                                           | Not applicable |
| Descriptive data         | 14* | (a) Give characteristics of study participants (eg demographic, clinical, social) and information on exposures and potential confounders                                                                     | 7-9            |
|                          |     | (b) Indicate number of participants with missing data for each variable of interest                                                                                                                          | 7-9            |
|                          |     | (c) <i>Cohort study</i> —Summarise follow-up time (eg, average and total amount)                                                                                                                             | 9              |
| Outcome data             | 15* | <i>Cohort study</i> —Report numbers of outcome events or summary measures over time                                                                                                                          | 9              |
|                          |     | <i>Case-control study</i> —Report numbers in each exposure category, or summary measures of exposure                                                                                                         | 7-9            |
|                          |     | <i>Cross-sectional study</i> —Report numbers of outcome events or summary measures                                                                                                                           | Not applicable |
| Main results             | 16  | (a) Give unadjusted estimates and, if applicable, confounder-adjusted estimates and their precision (eg, 95% confidence interval). Make clear which confounders were adjusted for and why they were included | 7-9            |
|                          |     | (b) Report category boundaries when continuous variables were categorized                                                                                                                                    | Tab 1          |
|                          |     | (c) If relevant, consider translating estimates of relative risk into absolute risk for a meaningful time period                                                                                             | Not applicable |
| Other analyses           | 17  | Report other analyses done—eg analyses of subgroups and interactions, and sensitivity analyses                                                                                                               | 7-9 & Tab 1    |
| <b>Discussion</b>        |     |                                                                                                                                                                                                              |                |
| Key results              | 18  | Summarise key results with reference to study objectives                                                                                                                                                     | 9-10           |
| Limitations              | 19  | Discuss limitations of the study, taking into account sources of potential bias or imprecision. Discuss both direction and magnitude of any potential bias                                                   | 13             |
| Interpretation           | 20  | Give a cautious overall interpretation of results considering objectives, limitations, multiplicity of analyses, results from similar studies, and other relevant evidence                                   | 11 & 14        |
| Generalisability         | 21  | Discuss the generalisability (external validity) of the study results                                                                                                                                        | 11-14          |
| <b>Other information</b> |     |                                                                                                                                                                                                              |                |
| Funding                  | 22  | Give the source of funding and the role of the funders for the present study and, if applicable, for the original study on which the present article is based                                                | 15             |

\*Give information separately for cases and controls in case-control studies and, if applicable, for exposed and unexposed groups in cohort and cross-sectional studies.

1  
2  
3  
4  
5  
6  
7  
8  
9  
10  
11  
12  
13  
14  
15  
16  
17  
18  
19  
20  
21  
22  
23  
24  
25  
26  
27  
28  
29  
30  
31  
32  
33  
34  
35  
36  
37  
38  
39  
40  
41  
42  
43  
44  
45  
46  
47  
48  
49  
50  
51  
52  
53  
54  
55  
56  
57  
58  
59  
60

**Note:** An Explanation and Elaboration article discusses each checklist item and gives methodological background and published examples of transparent reporting. The STROBE checklist is best used in conjunction with this article (freely available on the Web sites of PLoS Medicine at <http://www.plosmedicine.org/>, Annals of Internal Medicine at <http://www.annals.org/>, and Epidemiology at <http://www.epidem.com/>). Information on the STROBE Initiative is available at [www.strobe-statement.org](http://www.strobe-statement.org).

For peer review only
